# Integrin clustering enables anandamide-induced $\text{Ca}^{2+}$ signaling in endothelial cells via GPR55 by protection against $\text{CB}_1$ -receptor-triggered repression

Markus Waldeck-Weiermair<sup>1,\*</sup>, Cristina Zoratti<sup>1,\*</sup>, Karin Osibow<sup>1</sup>, Nariman Balenga<sup>2</sup>, Edith Goessnitzer<sup>3</sup>, Maria Waldhoer<sup>2</sup>, Roland Malli<sup>1</sup> and Wolfgang F. Graier<sup>1,\*‡</sup>

<sup>1</sup>Institute of Molecular Biology and Biochemistry, and <sup>2</sup>Institute of Experimental and Clinical Pharmacology, Medical University Graz, Graz, A8010, Austria

<sup>3</sup>Institute of Pharmaceutical Chemistry, University Graz, Graz Austria

\*These authors contributed equally to this work

‡Author for correspondence (e-mail: wolfgang.graier@meduni-graz.at)

Accepted 17 February 2008

Journal of Cell Science 121, 1704-1717 Published by The Company of Biologists 2008  
doi:10.1242/jcs.020958

## Summary

Although the endocannabinoid anandamide is frequently described to act predominantly in the cardiovascular system, the molecular mechanisms of its signaling remained unclear. In human endothelial cells, two receptors for anandamide were found, which were characterized as cannabinoid 1 receptor ( $\text{CB}_1\text{R}$ ;  $\text{CNR1}$ ) and G-protein-coupled receptor 55 (GPR55). Both receptors trigger distinct signaling pathways. It crucially depends on the activation status of integrins which signaling cascade becomes promoted upon anandamide stimulation. Under conditions of inactive integrins, anandamide initiates  $\text{CB}_1\text{R}$ -derived signaling, including  $\text{G}_i$ -protein-mediated activation of spleen tyrosine kinase (Syk), resulting in  $\text{NF}\kappa\text{B}$  translocation. Furthermore, Syk inhibits phosphoinositide 3-kinase (PI3K) that represents a key protein in the transduction

of GPR55-originated signaling. However, once integrins are clustered,  $\text{CB}_1\text{R}$  splits from integrins and, thus, Syk cannot further inhibit GPR55-triggered signaling resulting in intracellular  $\text{Ca}^{2+}$  mobilization from the endoplasmic reticulum (ER) via a PI3K-Bmx-phospholipase C (PLC) pathway and activation of nuclear factor of activated T-cells. Altogether, these data demonstrate that the physiological effects of anandamide on endothelial cells depend on the status of integrin clustering.

Supplementary material available online at

<http://jcs.biologists.org/cgi/content/full/121/10/1704/DC1>

Key words: Anandamide, Bmx/Etk, Cannabinoid signaling,  $\text{CB}_1$  receptor, GPR55,  $\text{Ca}^{2+}$  signaling, Integrins, Syk

## Introduction

The endogenous agonists of cannabinoid receptors exhibit multiple biological functions in various tissues, such as neurons, the immune system and the cardiovascular system (Hillard, 2000; Randall et al., 2002). Among these endocannabinoids, arachidonylethanolamide (anandamide) recognizes several receptors (Di Marzo et al., 2002) and acts predominantly in the cardiovascular system (Randall and Kendall, 1997; Randall and Kendall, 1998). Anandamide is produced by vascular endothelial cells (Deutsch et al., 1997; Sugiura et al., 1998) that express either the cannabinoid 1 receptor [ $\text{CB}_1\text{R}$ ;  $\text{CNR1}$  (Maccarrone et al., 2000)] or the  $\text{CB}_2$  receptor [ $\text{CB}_2\text{R}$ ;  $\text{CNR2}$  (Zoratti et al., 2003)], depending on the source and species of the cells. Notably, most of our recent knowledge on the CB receptor type underlying anandamide-induced physiological effects is based on the use of two selective inhibitors of  $\text{CB}_1\text{R}$  and  $\text{CB}_2\text{R}$ : rimonabant (SR141716A; N-(piperidin-1-yl)-5-(4-chlorophenyl)-1-(2,4-dichlorophenyl)-4-methyl-1H-pyrazole-3-carboxamide hydrochloride) (Rinaldi-Carmona et al., 1994; Showalter et al., 1996) and SR144528 [N-[(1S)-endo-1,3,3-trimethyl bicyclo[2.2.1] heptan-2-yl]-5-(4-chloro-3-methylphenyl)-1-(4-methylbenzyl)-pyrazolo le-3-carboxamide (Griffin et al., 2000; Rinaldi-Carmona et al., 1998; Showalter et al., 1996)], respectively. Endothelium-dependent relaxation was found to be sensitive to rimonabant (Chaytor et al., 1999; Mukhopadhyay et al., 2002; Wagner et al., 1999; White and Hiley, 1997) but not to gap junction

inhibitors (Chaytor et al., 1999) and blockade of the vanilloid receptor 1 (Grainger and Boachie-Ansah, 2001; Mukhopadhyay et al., 2002), another putative receptor of anandamide on endothelial cells. However, in mice that lack  $\text{CB}_1\text{R}$  and  $\text{CB}_2\text{R}$ , anandamide-induced mesenteric vasodilation was still prevented by rimonabant (Offertaler et al., 2003), thus, leading to the concept of an 'atypical' endothelial anandamide receptor (e-aR) that is also sensitive to rimonabant. Hence, this receptor was found to be activated by the cannabinoid analogs abnormal cannabidiol (-)-4-(3-3,4-trans-pmenthadien-[1,8]-yl)-olivetol and O1602 [5-methyl-4-[(1R,6R)-3-methyl-6-(1-methylethenyl)-2-cyclohexen-1-yl]-1,3-benzenediol; an agonist of 'atypical' non- $\text{CB}_1/\text{CB}_2$  endothelial anandamide receptor (Offertaler et al., 2003), and to be inhibited by O1918 (Offertaler et al., 2003). The e-aR was shown to be coupled to  $\text{G}_{i/o}$  protein and to trigger  $\text{Ca}^{2+}$ -activated formation of nitric oxide in endothelial cells (Mukhopadhyay et al., 2002).

Considering the large amount of recent reports using rimonabant and the variety of vascular effects of anandamide, which include inhibition of endothelin 1 expression (Ronco et al., 2006), relaxation of mesenteric arteries (Hoi and Hiley, 2006), or the inhibition of  $\text{CB}_1\text{R}$ -mediated tumor growth and metastatic spreading (Portella et al., 2003), endocannabinoid-triggered signaling in endothelial cells needs to be explored in more detail.

Despite the intriguing reports on the existence of e-aR in human endothelial cells, most reports on endothelial cells did not

differentiate between the signal transduction triggered by the two receptor types present. Thus, the underlying signal transduction cascades beyond each individual receptor type are still unclear. Moreover, as these receptors are presumably activated by anandamide at the same time, interplay between the two signaling cascades activated by each of these receptors may occur and needs further investigation.

Consequently, in this study we intended to explore the signaling cascades downstream of CB<sub>1</sub>R and e-aR in human endothelial cells. Furthermore, the interrelation and integration of the two signaling pathways on the initiation of cytosolic Ca<sup>2+</sup> signaling as a highly specific readout of activation of e-aR were investigated.

## Results

The effect of anandamide on endothelial Ca<sup>2+</sup> signaling inversely depended on external Ca<sup>2+</sup> and was due to atypical endothelial anandamide receptors

In the presence of 2 mM external Ca<sup>2+</sup>, addition of 10 μM anandamide yielded very small cytosolic Ca<sup>2+</sup> elevation in only 10% of the cells, which was far less than that obtained with 100 μM histamine under identical conditions (Fig. 1A). Similarly, the hydrolytically more stable analog methanandamide failed to initiate Ca<sup>2+</sup> elevation in the presence of external Ca<sup>2+</sup>, thus excluding Ca<sup>2+</sup>-dependent hydrolysis as being responsible for the lack of Ca<sup>2+</sup> signaling in response to anandamide in the presence of external Ca<sup>2+</sup>.

However, in the nominal absence of extracellular Ca<sup>2+</sup>, both agonists increased cytosolic Ca<sup>2+</sup> levels in endothelial cells (Fig. 1B) and, similar to histamine, over 95% of the cells responded to the endocannabinoid while there was no effect upon stimulation with 10 μM arachidonic acid (supplementary material Fig. S1). Moreover, consequent to a strong endoplasmic reticulum (ER) depletion by either anandamide or histamine (Fig. 1C), capacitative Ca<sup>2+</sup> entry was detected upon re-addition of extracellular Ca<sup>2+</sup> (Fig. 1B). The EC<sub>50</sub> for anandamide to initiate Ca<sup>2+</sup> signaling in nominally Ca<sup>2+</sup>-free solution was 7.3 (4.5–11.7) μM (*n*=10), which was comparable with that of the metabolically stable analog methanandamide [EC<sub>50</sub>=10.6 (9.9–11.3) μM, *n*=10] (Fig. 1D), thus indicating that anandamide-induced Ca<sup>2+</sup> signaling is directly evoked by the compound itself and not by a metabolite.

To define the receptor being involved in anandamide-triggered endothelial Ca<sup>2+</sup> signaling, the expression of CB<sub>1</sub>R but not CB<sub>2</sub>R was confirmed by RT-PCR in the human endothelial cells used in this study (Fig. 2A). Involvement of CB<sub>2</sub>R was further excluded by the lack of the CB<sub>2</sub>R antagonist SR144528 [1 μM (Rinaldi-Carmona et al., 1998)] (Table 1) to inhibit anandamide-induced Ca<sup>2+</sup> signaling in the nominal absence of extracellular Ca<sup>2+</sup> (supplementary material Fig. S2A). Similarly, inhibition of TRPV1 (VR1) receptors by SB366791 [4'-chloro-3-methoxycinnamylidide (Fowler et al., 2003)] (10 μM) failed to affect anandamide-induced Ca<sup>2+</sup> signaling under the same conditions (supplementary material Fig. S2B). By contrast, rimonabant (1 μM), an inhibitor of CB<sub>1</sub>R and e-aR (Jarai et al., 1999; Wagner et al., 1999), inhibited anandamide-induced Ca<sup>2+</sup> signaling in nominally Ca<sup>2+</sup>-free solution (Fig. 2B).

To further differentiate whether CB<sub>1</sub>R or e-aR is involved in anandamide-induced Ca<sup>2+</sup> signaling, the effects of specific receptor agonists and antagonists were tested. Inhibition of CB<sub>1</sub>R by 10 μM of the potent CB<sub>1</sub>R antagonist AM251 [N-(Piperidin-1-yl)-5-(4-iodophenyl)-1-(2,4-dichlorophenyl)-4-methyl-1H-pyrazole-3-carboxamide] (Table 1) (Pertwee, 2005) unmasked anandamide

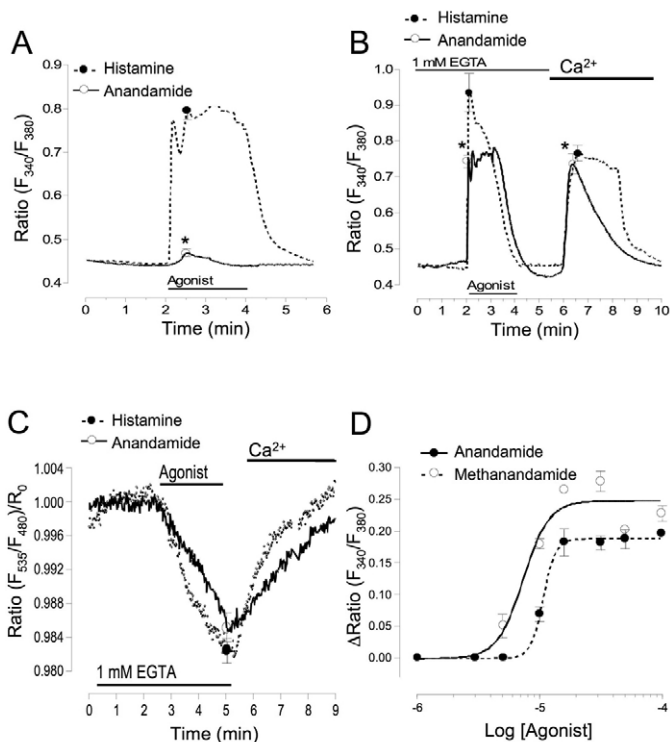

**Fig. 1.** Endocannabinoids trigger Ca<sup>2+</sup> signaling and ER depletion in human endothelial cells. (A) Comparison of the effects of 100 μM histamine (*n*=18) and 10 μM anandamide (*n*=31) on cytosolic free-Ca<sup>2+</sup> concentration in the presence of 2 mM extracellular Ca<sup>2+</sup>. (B) Cytoplasmic free-Ca<sup>2+</sup> concentration upon stimulation with 100 μM histamine (*n*=19) and 10 μM anandamide (*n*=21) in the absence of extracellular Ca<sup>2+</sup>, followed by re-addition of 2 mM extracellular Ca<sup>2+</sup> to reveal store-operated Ca<sup>2+</sup> entry due to previous ER depletion. (C) Comparison of the effects of 100 μM histamine (*n*=4) and 10 μM anandamide (*n*=3) on free ER Ca<sup>2+</sup> concentration in the absence of extracellular Ca<sup>2+</sup>, followed by re-addition of 2 mM extracellular Ca<sup>2+</sup> to visualize ER Ca<sup>2+</sup> refilling efficiency. (D) Concentration-response curves for anandamide (*n*=10) and methanandamide (*n*=10) on peak responses of cytosolic Ca<sup>2+</sup> elevation in the nominal absence of extracellular Ca<sup>2+</sup>. Cytosolic (A,B,D) and ER (C) Ca<sup>2+</sup> concentrations were recorded using fura-2 and YC4er, respectively. \**P*<0.01 versus histamine.

(10 μM)-induced Ca<sup>2+</sup> signaling even in the presence of extracellular Ca<sup>2+</sup> (Fig. 2C). In addition, the synthetic CB<sub>1</sub>R agonist HU-210 [10 μM (Felder et al., 1995)], which has been shown to couple with intracellular Ca<sup>2+</sup> signaling in HEK 293 cells, cultured hippocampal neurons (Lauckner et al., 2005) and rat insulinoma beta cells (De Petrocellis et al., 2007), failed to initiate endothelial Ca<sup>2+</sup> signaling in the presence and nominal absence of external Ca<sup>2+</sup> (supplementary material Fig. S2C). By contrast, 10 μM of O1602, an agonist of the e-aR (Table 1) (Bukoski et al., 2002; Jarai et al., 1999) evoked a very strong cytosolic Ca<sup>2+</sup> elevation even in the presence of extracellular Ca<sup>2+</sup> (Fig. 2D), which was not affected by the TRPV1 receptor inhibitor SB366791 (10 μM) (supplementary material Fig. S2D). In line with these findings, 10 μM of O1918 [1,3-dimethoxy-5-methyl-2-[(1R,6R)-3-methyl-6-(1-methylethenyl)-2-cyclohexen-1-yl]-benzene] (Table 1), a cannabidiol analog that acts as a selective antagonist of 'atypical' cannabidiol at the non-CB<sub>1</sub>/CB<sub>2</sub> endothelial anandamide receptor (Jarai et al., 1999; Mo et al., 2004; Offertaler et al., 2003), prevented anandamide-induced Ca<sup>2+</sup> signaling in the nominal absence of extracellular Ca<sup>2+</sup> (Fig.

**Table 1. Summary of the effect of tools used for the characterization of receptors involved in anandamide-triggered Ca<sup>2+</sup> signaling in endothelial cells**

| Compound (Figure)                        | Characteristics                       | Concentration (μM) | Effect                                                                | References                                                     |
|------------------------------------------|---------------------------------------|--------------------|-----------------------------------------------------------------------|----------------------------------------------------------------|
| LPI (suppl. Fig. S2G,H)                  | GPR55 agonist                         | 10                 | Triggered Ca <sup>2+</sup> signaling                                  | (Oka et al., 2007)                                             |
| HU210 (Fig. 2F, suppl. Fig. S2C)         | CB <sub>1</sub> R agonist             | 10                 | Prevented Ca <sup>2+</sup> signaling upon AEA                         | (Felder et al., 1995; Fischbach et al., 2007)                  |
| O1602 (Fig. 2D,F,K, suppl. Fig. S2D)     | e-aR/GPR55 agonist                    | 10                 | Triggered Ca <sup>2+</sup> signaling even in Ca <sup>2+</sup> buffer  | (Bukoski et al., 2002; Jarai et al., 1999; Johns et al., 2007) |
| O1618 (Fig. 2E)                          | e-aR/GPR55 antagonist (?)             | 10                 | Prevented Ca <sup>2+</sup> signaling to AEA                           | (Jarai et al., 1999; Mo et al., 2004; Offertaler et al., 2003) |
| Rimonabant (Fig. 2B)                     | CB <sub>1</sub> R and e-aR antagonist | 1                  | Prevented Ca <sup>2+</sup> signaling to AEA                           | (Jarai et al., 1999; Wagner et al., 1999)                      |
| AM251 (Fig. 2C)                          | CB <sub>1</sub> R antagonist          | 10                 | Unmasked Ca <sup>2+</sup> signaling to AEA in Ca <sup>2+</sup> buffer | (Fischbach et al., 2007)                                       |
| SR144528 (suppl. Fig. S2A)               | CB <sub>2</sub> R antagonist          | 1                  | No effect                                                             | (Rinaldi-Carmona et al., 1998)                                 |
| SB366791 (suppl. Fig. S2B)               | TRPV1R antagonist                     | 10                 | No effect                                                             | (Boudaka et al., 2007)                                         |
| GPR55 siRNA (Fig. 2H,I, suppl. Fig. S2H) | Knockdown of GPR55                    |                    | Diminished Ca <sup>2+</sup> signaling upon AEA, O1602, LPI            |                                                                |
| GPR55 (Fig. 2J,K, suppl. Fig. S2H)       | Overexpression of GPR55               |                    | Enhanced Ca <sup>2+</sup> signaling to AEA, O1602, LPI                |                                                                |

2E). Moreover, in the presence of the CB<sub>1</sub>R-specific agonist HU-210 (10 μM), activation of the e-aR with 10 μM O1602 failed to evoke Ca<sup>2+</sup> signaling, while, after washout of HU-210, O1602 initiated Ca<sup>2+</sup> signaling in the same cells (Fig. 2F). These data point to involvement of both anandamide receptors in endothelial cells in which CB<sub>1</sub>R inhibits the signal cascade beyond e-aR, which yields intracellular Ca<sup>2+</sup> mobilization and becomes overt in the nominal absence of external Ca<sup>2+</sup>.

The 'atypical' non-CB<sub>1</sub> and CB<sub>2</sub> endothelial anandamide receptor (e-aR) was identified as G-protein-coupled receptor 55 (GPR55)

To identify the e-aR molecularly, the endothelial cells used for this study were tested for GPR55, a putative anandamide-binding protein (Baker et al., 2006; Ryberg et al., 2007). Using the respective primers, mRNA of GPR55 was found in endothelial cells (Fig. 2G). Hence, treatment with siRNA against GPR55, which was proved to reduce the expression of GPR55 by ~56% (supplementary material Fig. S2E), strongly diminished anandamide-triggered Ca<sup>2+</sup> signaling in Ca<sup>2+</sup>-free solution, as well as the effect of O1602 in the presence of extracellular Ca<sup>2+</sup> (Fig. 2H,I, respectively), thus pointing to the involvement of GPR55 in anandamide-induced Ca<sup>2+</sup> signaling in endothelial cells. Overexpression of GPR55 (supplementary material Fig. S2F) strongly elevated anandamide-triggered Ca<sup>2+</sup> signaling in the nominal absence of extracellular Ca<sup>2+</sup> (Fig. 2J). Consistent with this, the effect of O1602 (10 μM) on endothelial cytosolic free-Ca<sup>2+</sup> was largely elevated in GPR55-overexpressing cells (Fig. 2K, Table 1).

Recently, GPR55 was described as a receptor of lysophosphatidylinositol [LPI (Oka et al., 2007)]. These data could be confirmed in endothelial cells in which the effect of 10 μM LPI was strongly reduced in cells treated with siRNA against GPR55 (supplementary material Fig. S2G), whereas overexpression of GPR55 yield enhanced Ca<sup>2+</sup> signaling by LPI (supplementary material Fig. S2H).

The effect of anandamide on endothelial Ca<sup>2+</sup> signaling was sensitive to divalent cations acting on extracellular binding sites

Based on the unusual sensitivity of anandamide-triggered Ca<sup>2+</sup> signaling to external Ca<sup>2+</sup>, we tested whether or not the inhibitory effect of extracellular Ca<sup>2+</sup> was due to Ca<sup>2+</sup>-dependent chelating of

anandamide in the medium. Using NMR spectroscopy, no evidence for a Ca<sup>2+</sup>-anandamide complex was found (supplementary material Fig. S3A,B). Moreover, anandamide uptake and binding did not differ in the nominal absence or presence of extracellular Ca<sup>2+</sup> (supplementary material Fig. S3C). The concentration-response curve of the inhibitory action of extracellular Ca<sup>2+</sup> on anandamide-triggered intracellular Ca<sup>2+</sup> signaling revealed an IC<sub>50</sub> of 7.7 (6.7–8.8) μM (Fig. 3A). Similarly, Sr<sup>2+</sup> and Ba<sup>2+</sup> inhibited anandamide-triggered Ca<sup>2+</sup> signaling in endothelial cells in a concentration-dependent manner (Fig. 3B). These results point to an extracellular Ca<sup>2+</sup>-binding site being responsible for its inhibitory effect on anandamide-induced Ca<sup>2+</sup> signaling.

Clustered αvβ3 and α5β1 integrins were involved in anandamide-induced Ca<sup>2+</sup> signaling in human endothelial cells. Remarkably, the IC<sub>50</sub> of extracellular Ca<sup>2+</sup> to prevent anandamide-induced Ca<sup>2+</sup> signaling was strikingly similar to that found for Ca<sup>2+</sup>-mediated inhibition of integrin clustering (Leitinger et al., 2000). Therefore, involvement of clustered integrins in the transition of anandamide to evoke Ca<sup>2+</sup> signaling was postulated. To challenge this hypothesis, clustering of integrins was initiated by Mn<sup>2+</sup>, which increases the affinity of integrins for their ligand and can stimulate integrin clustering (Mould et al., 1998; Smith and Cheresch, 1990), prior to measurement of the effect of anandamide on endothelial Ca<sup>2+</sup> concentration. Notably, in the presence of 70 μM Mn<sup>2+</sup>, anandamide yielded strong Ca<sup>2+</sup> elevation even in the presence of extracellular Ca<sup>2+</sup> (Fig. 3C). In line with these results, inhibition of RhoA-associated kinase 1 and RhoA-associated kinase 2 (ROCK1 and ROCK2) that are essentially involved in the clustering of integrins (Rodriguez-Fernandez et al., 2001), by Y27632 [(R)-(+)-trans-N-(4-Pyridyl)-4-(1-aminoethyl)-cyclohexanecarboxamide] [10 μM (Uehata et al., 1997)] strongly diminished anandamide-induced Ca<sup>2+</sup> signaling in the absence of extracellular Ca<sup>2+</sup> (Fig. 3D). Involvement of integrins was further confirmed by the inhibitory activities of fibronectin (20 μg/ml, supplementary material Fig. S3D), a large extracellular matrix protein ligand for endothelial integrins, and RGD, Arg-Gly-Asp peptide resembling the integrin-binding motif of fibronectin (Ruoslahti and Pierschbacher, 1987) (20 μg/ml; supplementary material Fig. S3E).

To further challenge the concept that integrins are involved in the process of anandamide-triggered Ca<sup>2+</sup> signaling, the effects

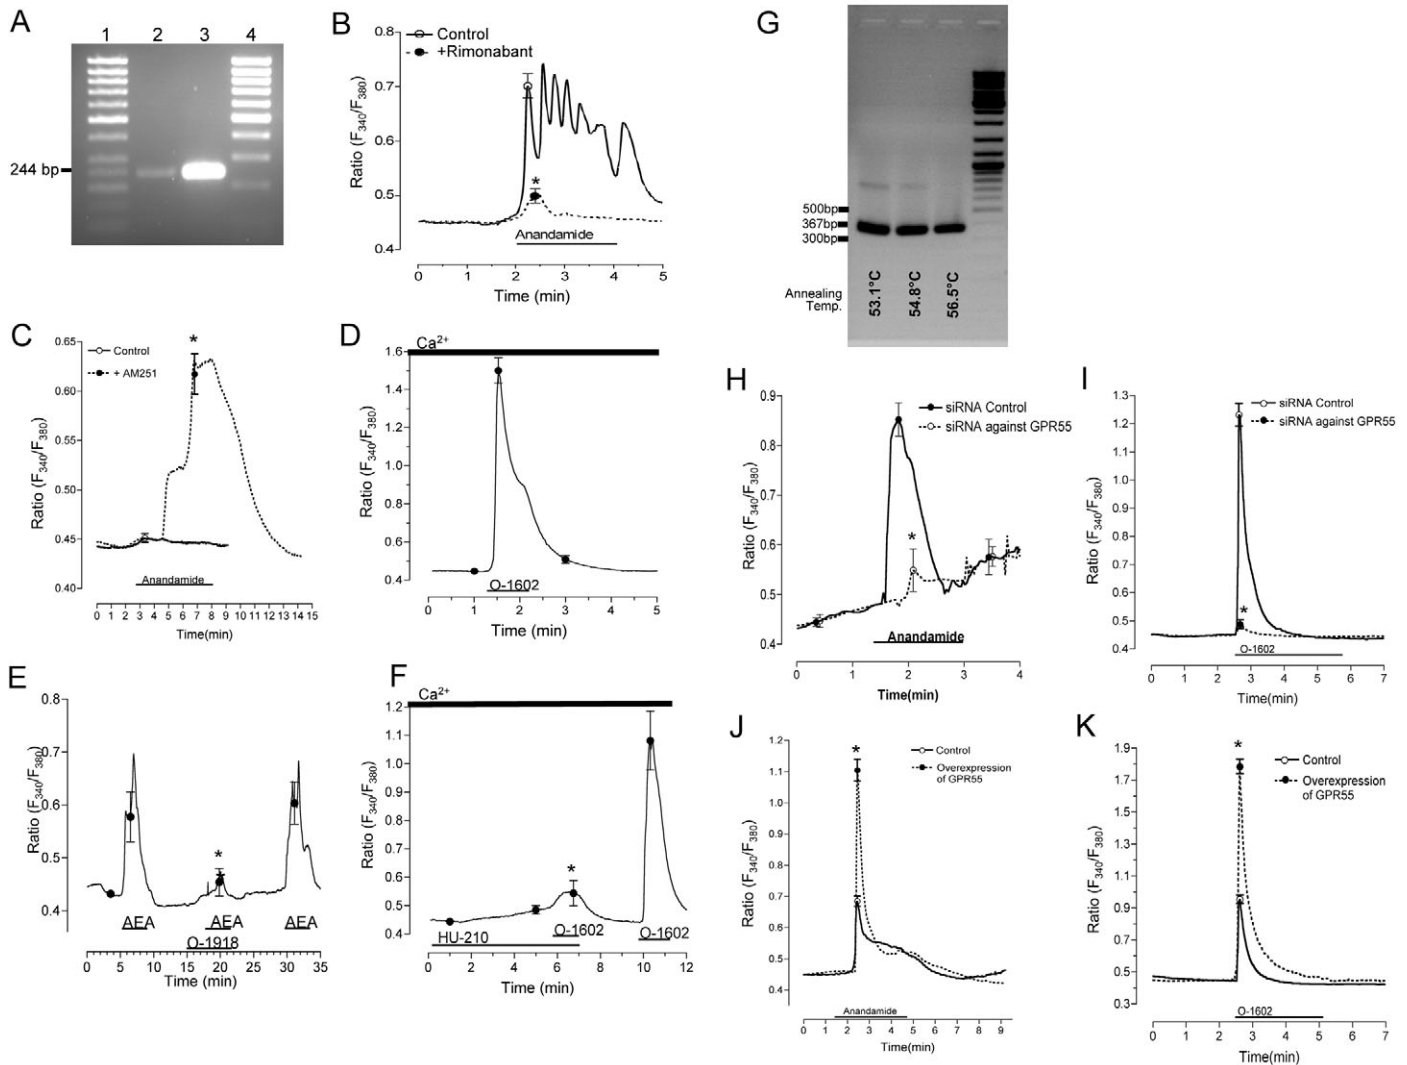

**Fig. 2.** ‘Atypical’ endothelial anandamide receptors are identified as GPR55 that mediates anandamide-initiated Ca<sup>2+</sup> signaling, while activation of CB<sub>1</sub> receptors prevent anandamide-induced Ca<sup>2+</sup> signaling. (A) Representative RT-PCR on CB<sub>1</sub>R in a human endothelial cell line (lane 2) in comparison with human brain as positive control (lane 3). (B) In Ca<sup>2+</sup>-free solution, the effect of 10 μM anandamide on cytosolic free-Ca<sup>2+</sup> concentration was analyzed in the absence (*n*=19) or presence of the CB<sub>1</sub>R antagonist rimonabant (1 μM) (*n*=28). (C) In the presence of the CB<sub>1</sub>R antagonist AM251 (10 μM), 10 μM anandamide triggered Ca<sup>2+</sup> signaling even in the presence of extracellular Ca<sup>2+</sup> (*n*=59). (D) In the presence of 2 mM extracellular Ca<sup>2+</sup>, the effect of the e-aR agonist O1602 (10 μM) on cytosolic free-Ca<sup>2+</sup> concentration was tested (*n*=17). (E) In the absence of extracellular Ca<sup>2+</sup>, the effect of O1918 (10 μM), an inhibitor of the e-aR, on anandamide (10 μM, AEA)-induced Ca<sup>2+</sup> signaling was assessed (*n*=8). (F) The effect of the CB<sub>1</sub>R agonist HU-210 (10 μM) on O1602 (e-aR agonist, 10 μM)-induced Ca<sup>2+</sup> signaling was tested in the presence of 2 mM extracellular Ca<sup>2+</sup> (*n*=10). (G) Representative RT-PCR on GPR55 in the human endothelial cell line using various annealing temperatures. (H) Pretreatment with siRNA against GPR55 (*n*=49; control, *n*=48) on anandamide (10 μM)-induced cytosolic Ca<sup>2+</sup> signaling was monitored in nominally Ca<sup>2+</sup>-free solution. (I) Pretreatment with siRNA against GPR55 (*n*=62; control, *n*=18) on O1602 (10 μM)-induced cytosolic Ca<sup>2+</sup> signaling in Ca<sup>2+</sup>-containing solution. (J) Consequences of GPR55 overexpression on anandamide (AEA, 10 μM)-induced Ca<sup>2+</sup> signaling in the nominal absence of extracellular Ca<sup>2+</sup> (*n*=43; control, *n*=42). (K) Consequences of GPR55 overexpression on O1602 (10 μM)-induced Ca<sup>2+</sup> signaling in the nominal absence of extracellular Ca<sup>2+</sup> (*n*=21; control, *n*=25). Cytosolic free-Ca<sup>2+</sup> concentrations were recorded using fura-2. \**P*<0.005 versus the absence of the respective receptor blocker/activator.

of the crosslinking antibody against αvβ3 integrin [LM609, 2 μM (Charo et al., 1990; Cheresh, 1987)] and two function-blocking antibodies against the β1 [JB1A, 2 μM (Mohri et al., 1996)] and the β3 subunits [B3A, 2 μM (Vignali et al., 1990)]. During preincubation for 15 minutes in Ca<sup>2+</sup>-containing medium, none of the integrin-targeting antibodies affected basal endothelial Ca<sup>2+</sup> levels, while all prevented the effect of anandamide in the absence of extracellular Ca<sup>2+</sup> (Fig. 3E-G). In line with these findings, B3A also prevented O1602-induced Ca<sup>2+</sup> signaling in Ca<sup>2+</sup>-containing buffer (Fig. 3H). These data point to the

involvement of αvβ3 and α5β1 integrins in GPR55-mediated Ca<sup>2+</sup> signaling by anandamide and O1602 in endothelial cells.

#### Anandamide induced diverse tyrosine phosphorylation patterns depending on the presence of extracellular Ca<sup>2+</sup>

As tyrosine kinases are known to represent early downstream targets of integrin-mediated signaling, the effect of anandamide on the activity of endothelial tyrosine kinases [using the FRET-based sensor Picchu 936X (Kurokawa et al., 2001; Schaeffer et al., 2003)] and the patterns of tyrosine phosphorylation were assessed in the



**Table 2. Summary of the effect of tools used for the characterization of signaling cascades downstream of endothelial anandamide receptors**

| Compound (Figure)                      | Characteristics                     | Concentration | Effect                                                                                                                                                       |
|----------------------------------------|-------------------------------------|---------------|--------------------------------------------------------------------------------------------------------------------------------------------------------------|
| PP1/PP2 (Fig. 4, suppl. Fig. S4B)      | Src family kinase inhibitors        | 10 $\mu$ M    | Prevented AEA and O-1602-triggered $\text{Ca}^{2+}$ signaling; inhibited protein phosphorylation in response to AEA                                          |
| Wortmannin (Fig. 5A,B, suppl. Fig. S5) | PI3K inhibitor                      | 0.1 $\mu$ M   | Prevented $\text{Ca}^{2+}$ signaling upon AEA ( $\text{Ca}^{2+}$ -free buffer) as well as that in response to O-1602 in $\text{Ca}^{2+}$ -containing buffer  |
| U73122 (Fig. 5C,D)                     | PLC inhibitor                       | 10 $\mu$ M    | Reduced $\text{Ca}^{2+}$ signaling upon AEA ( $\text{Ca}^{2+}$ -free buffer) as well as that in response to O-1602 in $\text{Ca}^{2+}$ -containing buffer    |
| LFM-A13 (Fig. 6C,D)                    | Bmx/Etk inhibitor                   | 10 $\mu$ M    | Prevented $\text{Ca}^{2+}$ signaling upon AEA ( $\text{Ca}^{2+}$ -free buffer) as well as that in response to O-1602 in $\text{Ca}^{2+}$ -containing buffer  |
| Bmx/Etk siRNA (Fig. 6B)                | Knockdown of Bmx/Etk                |               | Diminished $\text{Ca}^{2+}$ signaling upon AEA ( $\text{Ca}^{2+}$ -free buffer) as well as that in response to O-1602 in $\text{Ca}^{2+}$ -containing buffer |
| Piceatannol (Fig. 7A)                  | Syk inhibitor                       | 5 $\mu$ M     | Unmasked $\text{Ca}^{2+}$ signaling to AEA in $\text{Ca}^{2+}$ -containing buffer                                                                            |
| Syk siRNA (Fig. 7B)                    | Knockdown of Syk                    |               | Unmasked $\text{Ca}^{2+}$ signaling to AEA in $\text{Ca}^{2+}$ -containing buffer                                                                            |
| PTX (Fig. 7C)                          | Inhibitor of $\text{G}\alpha_{i/o}$ | 400 ng/ml     | Unmasked $\text{Ca}^{2+}$ signaling to AEA in $\text{Ca}^{2+}$ -containing buffer                                                                            |

presence and absence of extracellular  $\text{Ca}^{2+}$ . Notably, anandamide yielded fast activation of PP1-sensitive tyrosine kinases under any conditions indicated by increase in the FRET signal of Picchu 936X (Fig. 4A,B) but not the inactive mutant Picchu 938X. Although this is a rather general sensor for several tyrosine kinases and, thus, no conclusion can be drawn on the actual kinase(s) involved, it uniquely reveals the kinetics of tyrosine phosphorylation upon anandamide. However, corresponding western blot analyses revealed markedly different effects of anandamide on protein tyrosine phosphorylation, depending on extracellular  $\text{Ca}^{2+}$ . In the presence of extracellular  $\text{Ca}^{2+}$  a fast, strong and long lasting phosphorylation of a  $\sim 60$  kDa band occurred in response to

anandamide stimulation, while phosphorylation of a 70-80 kDa band reached its maximum 5 minutes after agonist stimulation (supplementary material Fig. S4A). By contrast, in the absence of external  $\text{Ca}^{2+}$  (i.e. under conditions of anandamide-induced  $\text{Ca}^{2+}$  signaling) the 70-80 kDa band appeared much earlier, while the  $\sim 60$  kDa band was delayed compared with the presence of extracellular  $\text{Ca}^{2+}$  (supplementary material Fig. S4A). Identical findings were obtained in the presence of 70  $\mu$ M  $\text{Mn}^{2+}$  in  $\text{Ca}^{2+}$ -containing buffer.

Tyrosine phosphorylation upon anandamide in presence and absence of extracellular  $\text{Ca}^{2+}$  was prevented by 10  $\mu$ M PP1 [1-(1,1-Dimethylethyl)-1-(4-methylphenyl)-1H-pyrazolo[3,4-d]pyrimidin-

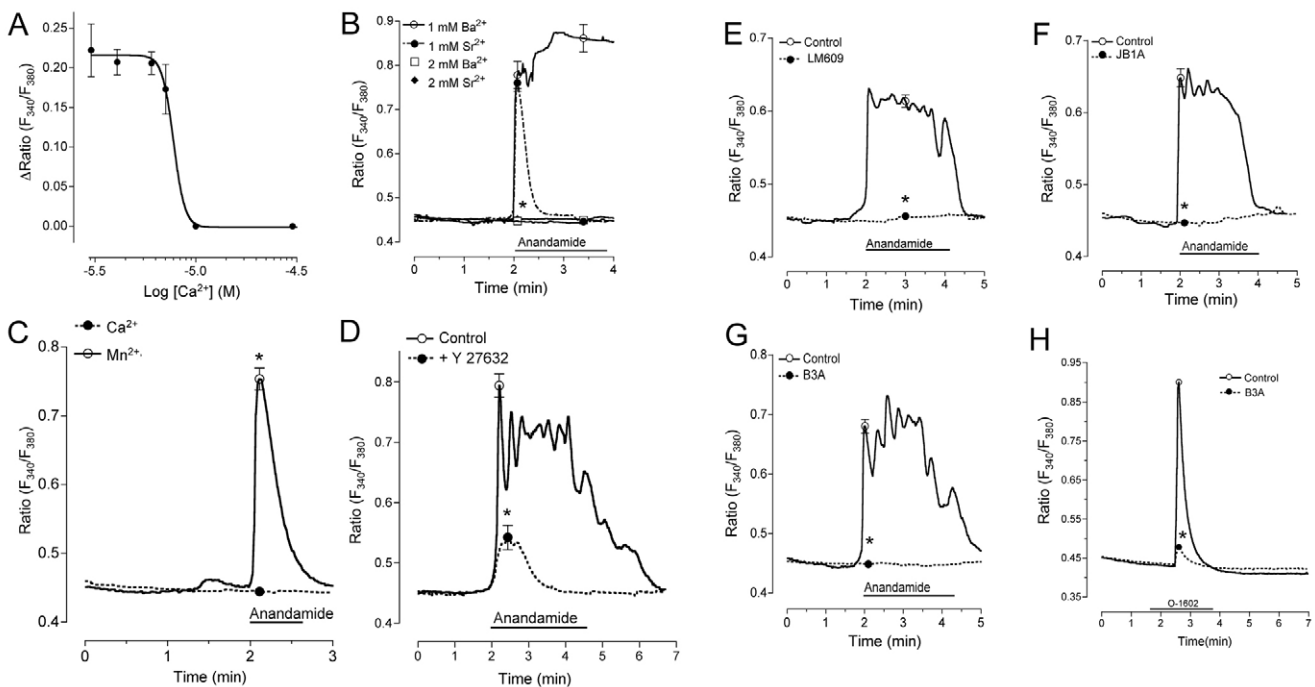

**Fig. 3.** Anandamide/GPR55-induced  $\text{Ca}^{2+}$  signaling is linked to integrins. (A,B) The sensitivity of anandamide (10  $\mu$ M)-triggered cytosolic  $\text{Ca}^{2+}$  signaling to various concentrations of extracellular  $\text{Ca}^{2+}$  ( $n=10$ ),  $\text{Ba}^{2+}$  ( $n=24$ ) and  $\text{Sr}^{2+}$  ( $n=31$ ) was tested. (C) Comparison between the effect of 10  $\mu$ M anandamide in  $\text{Ca}^{2+}$ -containing buffer in the absence ( $n=20$ ) or presence of 70  $\mu$ M  $\text{Mn}^{2+}$  ( $n=40$ ). (D) The effect of 10  $\mu$ M anandamide on cytosolic free- $\text{Ca}^{2+}$  concentration was monitored in the nominally  $\text{Ca}^{2+}$ -free solution in the absence ( $n=25$ ) or presence of the ROCK inhibitor Y27632 (10  $\mu$ M,  $n=29$ ). (E-G) The effects of antibodies (2  $\mu$ M) against  $\alpha\text{v}\beta 3$  integrin (LM609) (control,  $n=34$ ; LM609,  $n=30$ ) and the  $\beta 1$  (JB1A) (control,  $n=28$ ; JB1A,  $n=33$ ) and  $\beta 3$  subunits (B3A) (control,  $n=38$ ; B3A,  $n=30$ ) on cytosolic  $\text{Ca}^{2+}$  signaling induced by 10  $\mu$ M anandamide was assessed in nominally  $\text{Ca}^{2+}$ -free solution. (H) The effect of function-blocking  $\beta 3$ -integrin antibody B3A on O1602 (10  $\mu$ M)-initiated  $\text{Ca}^{2+}$  signaling in the presence of extracellular  $\text{Ca}^{2+}$  (control,  $n=65$ ; B3A,  $n=84$ ). Cytosolic free- $\text{Ca}^{2+}$  concentrations were recorded using fura-2. \* $P < 0.0001$  versus the absence of the respective compound.

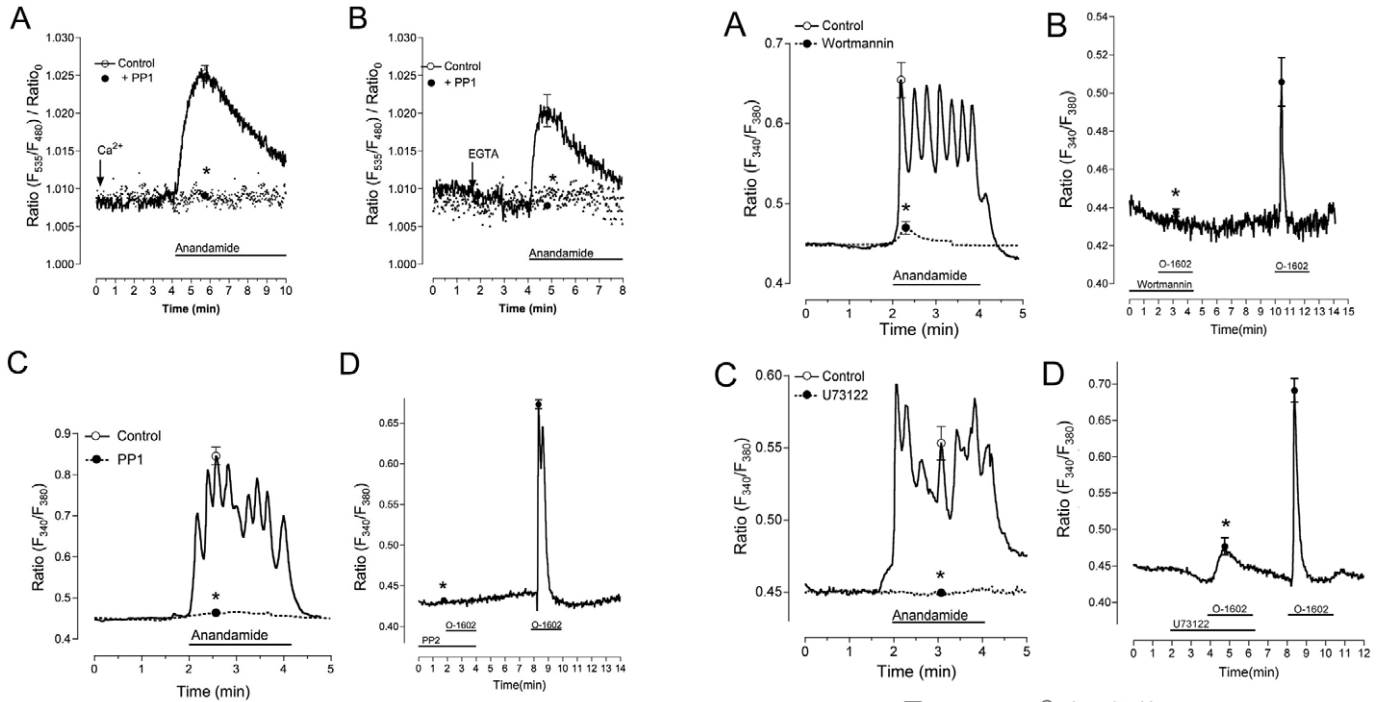

**Fig. 4.** Anandamide initiates tyrosine phosphorylation. (A,B) The effect of anandamide (10  $\mu$ M)-induced activation of tyrosine kinases was visualized in single endothelial cells in the presence (A) and absence (B) of extracellular Ca<sup>2+</sup>. As indicated, 10  $\mu$ M PP1 was added to the media ( $n=4$  under each condition). Tyrosine kinase activity was monitored by measuring the excitation ratio of F<sub>535</sub>/F<sub>480</sub> nm (FRET) at 440 nm excitation. (C) The effect of 10  $\mu$ M anandamide on cytosolic free-Ca<sup>2+</sup> concentration was tested in nominally Ca<sup>2+</sup>-free solution in the absence ( $n=24$ ) or presence of 10  $\mu$ M PP1 ( $n=25$ ). (D) In Ca<sup>2+</sup>-containing solution, Ca<sup>2+</sup> intracellular Ca<sup>2+</sup> signaling was initiated by 10  $\mu$ M O1602 in the presence of 10  $\mu$ M PP2, followed by an additional stimulation with 10  $\mu$ M O1602 after washout of PP2 as indicated ( $n=14$ ). For visualization of tyrosine kinase activity in single endothelial cells, cells were transiently transfected with Picchu 936X. Cytosolic free-Ca<sup>2+</sup> concentration was recorded using fura-2. \* $P<0.001$  versus the absence of PP1.

4-amine; a potent inhibitor of Src-family tyrosine kinases (Hanke et al., 1996)] (supplementary material Fig. S4B), which also abolished anandamide-triggered Ca<sup>2+</sup> signaling in Ca<sup>2+</sup>-free solution (Fig. 4C), pointing to the activation of Src-family kinase(s) under all conditions. This assumption was further supported by the inhibitory effect of 10  $\mu$ M PP2 [3-(4-chlorophenyl) 1-(1,1-dimethylethyl)-1H-pyrazolo[3,4-d]pyrimidin-4-amine; a potent inhibitor of Src-family tyrosine kinases (Hanke et al., 1996)] on O1602-induced Ca<sup>2+</sup> signaling in Ca<sup>2+</sup>-containing solution (Fig. 4D, Table 2).

PI3K, Bmx/Etk and PLC represented downstream targets of integrin-dependent anandamide/GPR55-induced signal transduction in endothelial cells

At 0.1  $\mu$ M, the selective inhibitor of phosphoinositide 3 kinase (PI3K) wortmannin (Table 2) diminished tyrosine phosphorylation of the 70-80 kDa band (supplementary material Fig. S5) and abolished anandamide-triggered Ca<sup>2+</sup> signaling in nominally Ca<sup>2+</sup>-free solution (Fig. 5A) and in the presence of 70  $\mu$ M Mn<sup>2+</sup> in Ca<sup>2+</sup>-containing buffer (data not shown). Notably, wortmannin was less active in reducing the 70-80 kDa band in the presence of extracellular Ca<sup>2+</sup>, suggesting two different proteins between 70-80 kDa: a wortmannin-sensitive one becoming phosphorylated in

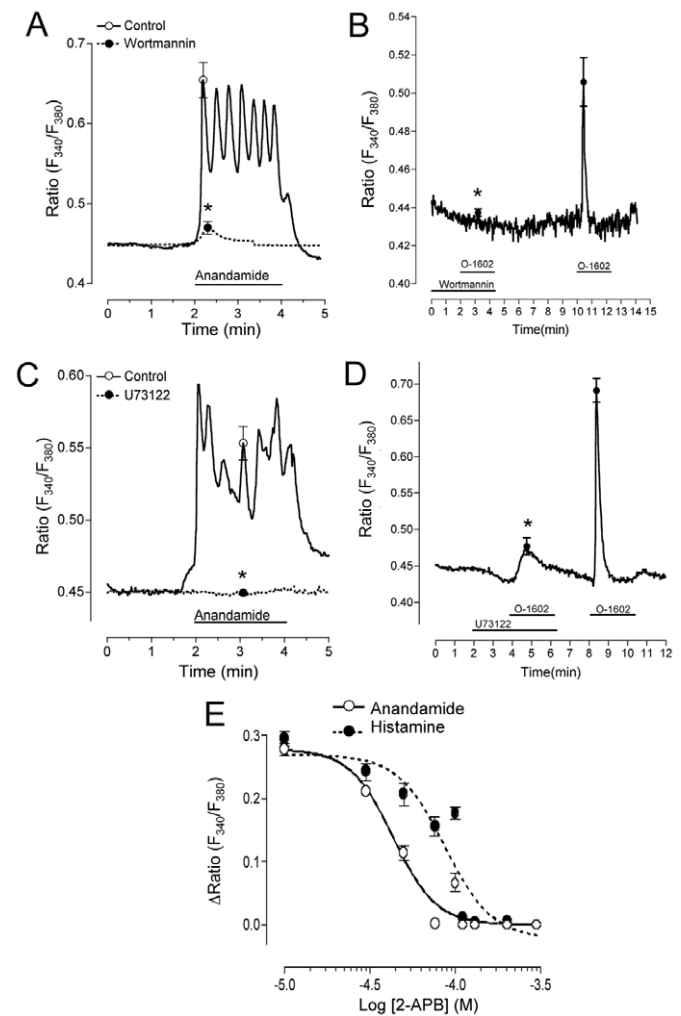

**Fig. 5.** PI3K is involved in anandamide/GPR55-evoked Ca<sup>2+</sup> signaling. (A) The effect of 10  $\mu$ M anandamide on cytosolic free-Ca<sup>2+</sup> concentration was tested in the nominal Ca<sup>2+</sup>-free solution in the absence ( $n=33$ ) or presence ( $n=38$ ) of 0.1  $\mu$ M wortmannin. (B) In the presence of extracellular Ca<sup>2+</sup>, intracellular Ca<sup>2+</sup> signaling was initiated by 10  $\mu$ M O1602 in the presence of 0.1  $\mu$ M wortmannin followed by an additional stimulation with 10  $\mu$ M O1602 after washout of the PI3K inhibitor as indicated ( $n=14$ ). (C) The effect of the PLC inhibitor U73122 (2  $\mu$ M,  $n=26$ ; control,  $n=30$ ) on anandamide (10  $\mu$ M)-triggered cytosolic Ca<sup>2+</sup> signaling was tested in Ca<sup>2+</sup>-free buffer. (D) In Ca<sup>2+</sup>-containing buffer, intracellular Ca<sup>2+</sup> signaling was initiated by 10  $\mu$ M O1602 in the presence of 1  $\mu$ M U73122 followed by an additional stimulation with 10  $\mu$ M O1602 after washout of the PLC inhibitor as indicated ( $n=14$ ). (E) Concentration-response relationship of 2APB on cytosolic Ca<sup>2+</sup> signaling induced by either 100  $\mu$ M histamine ( $n=4$ ) or 10  $\mu$ M anandamide ( $n=6$ ) in nominally Ca<sup>2+</sup>-free solution. Cytosolic free-Ca<sup>2+</sup> concentrations were recorded in single cells using fura-2. \* $P<0.001$  versus the absence of the inhibitor.

the absence of extracellular Ca<sup>2+</sup> (or the presence of 70  $\mu$ M Mn<sup>2+</sup>); and a wortmannin-insensitive protein being phosphorylated in the presence of extracellular Ca<sup>2+</sup>. In line with the inhibitory potential of wortmannin on anandamide-induced Ca<sup>2+</sup> signaling in nominal Ca<sup>2+</sup>-free/Mn<sup>2+</sup>-containing solutions, this PI3K inhibitor prevented Ca<sup>2+</sup> signaling in response to O1602 in the presence of extracellular Ca<sup>2+</sup> (Fig. 5B, Table 2).

To test the involvement of phospholipase C (PLC) activation in the integrin/PI3K-dependent Ca<sup>2+</sup> recruitment by anandamide, U73122 [(1-[6-[[[17 $\beta$ ]-3-Methoxyestra-1,3,5(10)-trien-17-yl]amino]hexyl]-

1H-pyrrole-2,5dione (Bleasdale et al., 1990), Table 2], an inhibitor of PLC (Aschner et al., 1997) was used. Cytosolic  $\text{Ca}^{2+}$  elevations induced by anandamide in the absence of external  $\text{Ca}^{2+}$  (Fig. 5C) or O1602 in  $\text{Ca}^{2+}$ -containing buffer (Fig. 5D) were prevented by 2  $\mu\text{M}$  U73122. Moreover, the rather unspecific and membrane permeable  $\text{Ins}(1,4,5)\text{P}_3$ -receptor antagonist 2APB [2-aminoethoxydiphenylborate (Maruyama et al., 1997; Koganezawa and Shimada, 2002)] prevented endothelial  $\text{Ca}^{2+}$  elevation in response to 10  $\mu\text{M}$  anandamide and 10  $\mu\text{M}$  histamine at comparable potency with  $\text{IC}_{50}$  values of 43 (30-60) and 87 (50-152)  $\mu\text{M}$ , respectively (Fig. 5E). These data suggest that anandamide-triggered  $\text{Ca}^{2+}$  signaling is due to PLC-mediated formation of  $\text{Ins}(1,4,5)\text{P}_3$  that, in turn, elevates cytosolic  $\text{Ca}^{2+}$  concentration by intracellular mobilization from the ER.

One potential candidate for bridging PI3K activation to PLC stimulation is bone marrow kinase, X-linked/epithelial and endothelial tyrosine kinase (Bmx/Etk) (Qiu and Kung, 2000), a member of the Tec family (Takesono et al., 2002). Immunoprecipitation revealed a  $3.2 \pm 0.5$ -fold ( $n=4$ ) increase in phosphorylation of Bmx/Etk upon anandamide in the absence but not presence of extracellular  $\text{Ca}^{2+}$  (Fig. 6A). Accordingly, siRNA against Bmx/Etk (efficiency shown in supplementary material Fig. S6A) diminished anandamide-induced  $\text{Ca}^{2+}$  signaling in the absence of external  $\text{Ca}^{2+}$  or in the presence of 70  $\mu\text{M}$   $\text{Mn}^{2+}$  in  $\text{Ca}^{2+}$ -containing solution (Fig. 6B). Moreover, 10  $\mu\text{M}$  of the selective Tec family inhibitor LFM-A13 [2-cyano-N-(2,5-dibromophenyl)-3-hydroxy-2-butenamide, Table 2] (Chau et al., 2002) prevented anandamide-triggered  $\text{Ca}^{2+}$  signaling in the absence of external  $\text{Ca}^{2+}$  or (Fig. 6C) in the presence of  $\text{Mn}^{2+}$  in  $\text{Ca}^{2+}$ -containing solution. These data are in line with phosphorylation of the 70-80 kDa band upon anandamide stimulation (supplementary material Fig. S5) representing Bmx/Etk that, in turn, activates  $\text{PLC}\gamma$  leading to intracellular  $\text{Ca}^{2+}$  mobilization via the generation of  $\text{Ins}(1,4,5)\text{P}_3$ . Consistent with this, inhibition of Bmx/Etk by 10  $\mu\text{M}$  LFM-A13 also prevented O1602 (10  $\mu\text{M}$ )-triggered  $\text{Ca}^{2+}$  signaling in  $\text{Ca}^{2+}$  containing solution (Fig. 6D).

In the presence of external  $\text{Ca}^{2+}$ , activation of Syk via  $\text{G}\alpha_{i/o}$  exhibited inhibitory action on PI3K-Bmx- $\text{PLC}\gamma$  pathway and prevented anandamide/GPR55-induced  $\text{Ca}^{2+}$  signaling. Based on the western blot (supplementary material Fig. S5) that revealed a wortmannin-insensitive tyrosine phosphorylation at 70-80 kDa in the presence but not absence of extracellular  $\text{Ca}^{2+}$ , a negative-feedback mechanism against the PI3K-Bmx- $\text{PLC}\gamma$  signaling via tyrosine phosphorylation [possibly via spleen tyrosine kinase (Syk)] was hypothesized. RT-PCR of the endothelial cell line used proved the expression of Syk in its long form (Wang et al., 2003) (supplementary material Fig. 6B), which matches the 70-80 kDa band in western blots (supplementary material Fig. S5). To further challenge the concept of inhibitory action of Syk on PI3K-Bmx- $\text{PLC}\gamma$  signaling, the effect of the Syk inhibitor piceatannol [3,4,3',5'-tetrahydroxy-trans-stilbene (Geahlen and McLaughlin, 1989; Ashikawa et al., 2002)] was investigated. In cells that only weakly responded to anandamide in the presence of external  $\text{Ca}^{2+}$ , this agonist yielded strong  $\text{Ca}^{2+}$  signaling in the presence of 5  $\mu\text{M}$  piceatannol (Fig. 7A, Table 2). These findings were further supported by the induction of  $\text{Ca}^{2+}$  signaling by anandamide despite the presence of extracellular  $\text{Ca}^{2+}$  (Fig. 7B) in cells, which were transiently transfected with siRNA against Syk (supplementary material Fig. S6A). To verify the signaling mechanisms by which endothelial  $\text{CB}_1\text{R}$  triggers activation of Syk,  $\text{G}\alpha_{i/o}$  protein, which has been reported to be coupled to this cannabinoid receptor

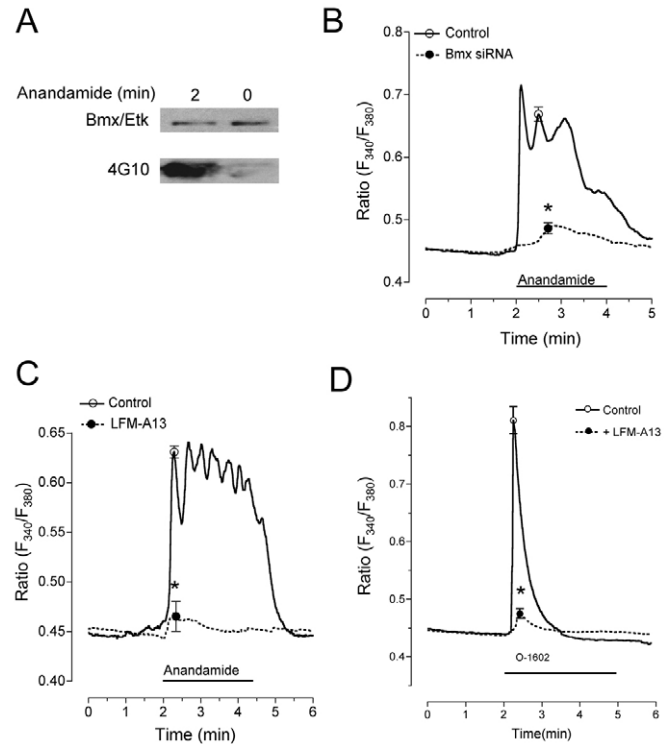

**Fig. 6.** Bmx/Etk is the downstream target for PI3K upon GPR55 stimulation by anandamide. (A) Phosphorylation of Bmx/Etk upon stimulation with 10  $\mu\text{M}$  anandamide in the nominal absence of extracellular  $\text{Ca}^{2+}$  was tested by immunoprecipitation using anti-Bmx/Etk antibody (upper blot) and subsequent staining with the anti-phosphotyrosine antibody 4G10 (lower blot). (B,C) The effects of the Tec-family (Bmx/Etk) kinase inhibitor LFM-A13 (10  $\mu\text{M}$ ,  $n=46$ ; control,  $n=30$ ) or pretreatment with siRNA against Bmx/Etk ( $n=6$ ; control,  $n=27$ ) on anandamide (10  $\mu\text{M}$ )-induced cytosolic  $\text{Ca}^{2+}$  signaling were monitored in nominally  $\text{Ca}^{2+}$ -free solution. (D) The effect of the Tec-family (Bmx/Etk) kinase inhibitor LFM-A13 (10  $\mu\text{M}$ ,  $n=75$ ; control,  $n=71$ ) on O1602 (10  $\mu\text{M}$ )-triggered cytosolic  $\text{Ca}^{2+}$  signaling in  $\text{Ca}^{2+}$ -containing buffer was tested. Standard immunoprecipitation was applied. In experiments with siRNA, cells were transiently transfected with a vector encoding approved siRNA against Bmx/Etk. Experiments were performed 48 hours after transfection. Cytosolic free- $\text{Ca}^{2+}$  concentrations were recorded using fura-2. \* $P < 0.0001$  versus the absence of the inhibitor.

(Mukhopadhyay et al., 2002), was inhibited by ADP ribosylation with pertussis toxin. Inhibition of  $\text{G}\alpha_{i/o}$  protein by pertussis toxin (Table 2) (400 ng/ml, 3 hours) yielded anandamide-induced  $\text{Ca}^{2+}$  signaling even in the presence of extracellular  $\text{Ca}^{2+}$  (Fig. 7C), thus pointing to  $\text{G}\alpha_{i/o}$ -mediated activation of Syk that, in turn, inhibits PI3K-Bmx- $\text{PLC}\gamma$ - $\text{Ca}^{2+}$  signaling (see Fig. 10).

#### Clustered $\beta 1$ integrin released binding to $\text{CB}_1$ receptor upon anandamide stimulation

To explore how integrin-clustering shields anandamide-induced PI3K-Bmx- $\text{PLC}\gamma$ - $\text{Ca}^{2+}$  signaling from the inhibitory effect of  $\text{CB}_1\text{R}$ - $\text{G}\alpha_{i/o}$ -Syk signaling, interaction of integrins with  $\text{CB}_1\text{R}$  was investigated by immunoprecipitation. Under conditions of unclustered integrins (i.e. in the presence of external  $\text{Ca}^{2+}$ ), the binding of  $\text{CB}_1\text{R}$  to  $\beta 1$  integrin was not affected by anandamide (normalized  $\text{CB}_1\text{R}$  ratio without versus with anandamide 1:  $1.03 \pm 0.04$ ,  $n=4$ , n.s.; Fig. 7D). By contrast, if integrin clustering was facilitated by  $\text{Mn}^{2+}$ , anandamide yielded detachment of the  $\text{CB}_1\text{R}$  from  $\beta 1$  integrin ( $\text{CB}_1\text{R}$  was normalized to  $\beta 1$  integrin;  $\text{CB}_1\text{R}$  ratio without anandamide versus

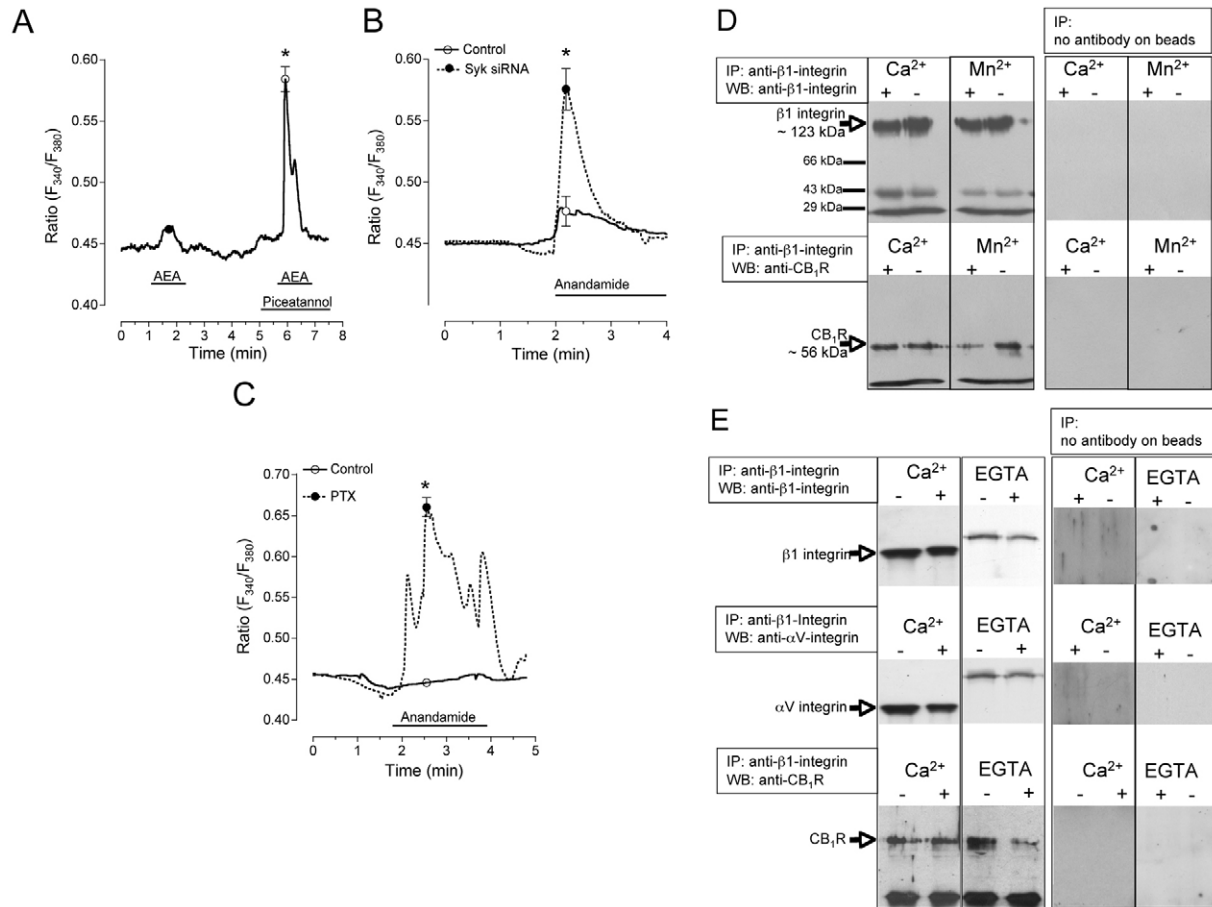

**Fig. 7.** Syk is the mediator of CB<sub>1</sub>R-originated repression of anandamide-induced Ca<sup>2+</sup> signaling. (A,B) The inhibition of Syk by either its inhibitor piceatannol (5  $\mu$ M,  $n=24$ ) or siRNA against Syk ( $n=7$ ; control,  $n=4$ ) allowed strong cytosolic Ca<sup>2+</sup> elevation in response to 10  $\mu$ M anandamide in the presence of 2 mM extracellular Ca<sup>2+</sup>. (C) The effect of the G<sub>i</sub> protein inhibitor pertussis toxin (400 ng/ml for 3 hours,  $n=8$ ; control,  $n=8$ ) on anandamide (10  $\mu$ M)-induced Ca<sup>2+</sup> signaling in the presence of 2 mM extracellular Ca<sup>2+</sup> was verified in human endothelial cells. (D) Immunoprecipitation using anti- $\beta$ 1-integrin antibody and subsequent staining with either anti- $\beta$ 1-integrin (upper blot) or anti-CB<sub>1</sub>R (lower blot). Endothelial extracts were harvested from cells under basal conditions (-) and after stimulation with 10  $\mu$ M anandamide (+) in the presence of 2 mM extracellular Ca<sup>2+</sup> (Ca<sup>2+</sup>) or 2 mM extracellular Ca<sup>2+</sup> plus 70  $\mu$ M Mn<sup>2+</sup> (Mn<sup>2+</sup>). Right panels shows precipitation with beads that were not preloaded with anti- $\beta$ 1-integrin were used. (E) Immunoprecipitation using anti- $\beta$ 1-integrin antibody and subsequent staining with either anti- $\beta$ 1-integrin (upper blot), anti- $\alpha$ V-integrin (middle blot) or anti-CB<sub>1</sub>R (lower blot). Endothelial extracts were harvested from cells under basal conditions (-) and after stimulation with 10  $\mu$ M anandamide (+) in the and absence (EGTA) of extracellular Ca<sup>2+</sup>. Right panels shows precipitation with beads that were not preloaded with anti- $\beta$ 1-integrin were used. Standard immunoprecipitation was applied. In experiments with siRNA, cells were transiently transfected with a vector encoding approved siRNA against Syk 48 hours prior to the experiments. Cytosolic free-Ca<sup>2+</sup> concentrations were recorded using fura-2. \* $P < 0.0001$  versus the absence of the inhibitor.

with anandamide 1:  $0.31 \pm 0.13$ ,  $n=4$ ,  $P < 0.05$ ; Fig. 7D). Identical results were obtained in Ca<sup>2+</sup>-free solution (CB<sub>1</sub>R was normalized to  $\beta$ 1 integrin; CB<sub>1</sub>R ratio without anandamide versus with anandamide 1:  $0.30 \pm 0.21$ ,  $n=3$ ,  $P < 0.05$ ; Fig. 7E). Although under conditions of clustered integrins the binding of the CB<sub>1</sub>R to  $\beta$ 1 integrin was affected by anandamide, it did not alter the localization/distribution of CB<sub>1</sub>R (supplementary material Fig. S6C).

Thus, under conditions of clustered integrins, anandamide yielded detachment of the CB<sub>1</sub>R from  $\beta$ 1 integrin, which, in turn, may preserve anandamide-induced signaling pathways via e-aR leading to cytosolic Ca<sup>2+</sup> elevation.

Depending on integrin clustering, anandamide triggered either nuclear accumulation of NF $\kappa$ B or NFAT while MAPK activation occurred under all conditions

To investigate transcriptional consequences of the two distinct signaling pathways initiated by anandamide via either CB<sub>1</sub>R or e-

aR, the nuclear recruitment of nuclear factor  $\kappa$ B (NF $\kappa$ B) and nuclear factor of activated T-cells (NFAT) upon anandamide stimulation was investigated under conditions of clustered and unclustered integrins. In the presence of extracellular Ca<sup>2+</sup> (i.e. unclustered integrins), anandamide evoked nuclear accumulation of the p65 subunit of NF $\kappa$ B (Fig. 8A) but not NFAT (Fig. 9A), whereas if integrins were clustered by Mn<sup>2+</sup> in the presence of external Ca<sup>2+</sup>, anandamide failed to stimulate p65 translocation (Fig. 8B) but evoked strong nuclear accumulation of NFAT (Fig. 9B).

In contrast to the selective activation of the transcription factors NF $\kappa$ B and NFAT, Erk1 and Erk2 were activated by anandamide under all circumstances. Notably, Erk1 and Erk2 activation in response to anandamide was slightly faster ( $+42 \pm 26\%$  after 2 minutes) but less pronounced (maxima  $+430 \pm 88\%$  after 45 minutes;  $n=3$ ) under conditions of unclustered integrins (Fig. 9C) than if integrin clustering was evoked by Mn<sup>2+</sup> ( $-5 \pm 17\%$  after 2 minutes



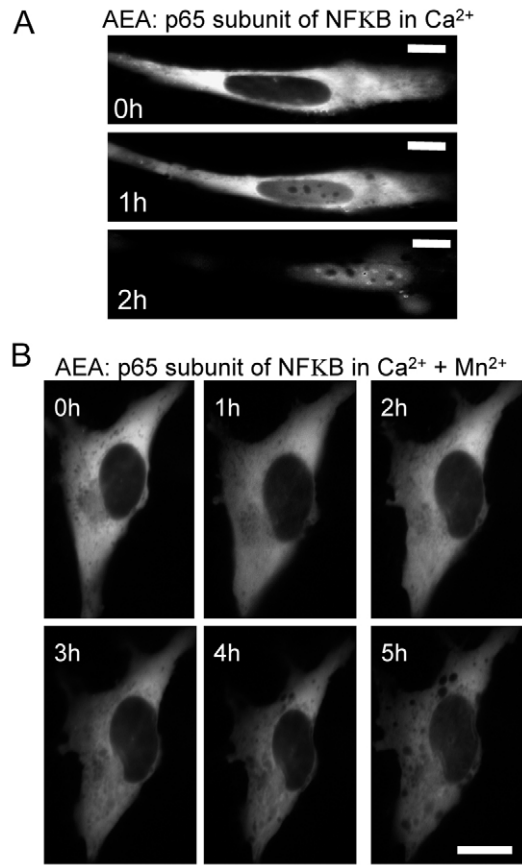

**Fig. 8.** NF $\kappa$ B is activated independently of anandamide-triggered  $\text{Ca}^{2+}$  signals. The effect of 10  $\mu\text{M}$  anandamide on the (trans)location of GFP-tagged p65 subunit of NF $\kappa$ B was visualized in endothelial cells in buffer containing 2 mM  $\text{Ca}^{2+}$  in the absence (A) or presence (B) of 70  $\mu\text{M}$   $\text{Mn}^{2+}$ . Images of endothelial cells that were transiently transfected with p65-GFP were taken 48 hours after transfection using a conventional fluorescence microscope. Representative images of at least 10 cells out of three experiments on alternate days are shown. Scale bars: 10  $\mu\text{m}$ .

and maxima  $+730\pm 185\%$  after 45 minutes;  $n=3$ ) (Fig. 9D) or in the absence of extracellular  $\text{Ca}^{2+}$  (data not shown).

## Discussion

Our data demonstrate that two distinct receptors for anandamide exist in human endothelial cells, which were characterized as CB $_1$ R and GPR55. Both receptors trigger distinct signaling pathways, whereby one exhibits negative feedback on the other, depending on the status of integrin configuration. As illustrated in Fig. 10A, the presence of extracellular  $\text{Ca}^{2+}$  anandamide binding to CB $_1$ R results in G $_i$  protein-mediated activation of Syk and its subsequent signal transduction pathway, resulting in activation of NF $\kappa$ B. Additionally, Syk inhibits PI3K that represents a key signaling protein in the transduction of GPR55-originated signaling. However, once integrins are clustered (Fig. 10B), either by removal of extracellular  $\text{Ca}^{2+}$  or addition of  $\text{Mn}^{2+}$ , Syk does not further inhibit GPR55-triggered signaling. Subsequently, the latter causes intracellular  $\text{Ca}^{2+}$  mobilization from the ER via a PI3K-Bmx-PLC $\gamma$  pathway and, in turn, activation of  $\text{Ca}^{2+}$ -activated NFAT (Fig. 10B). Notably, although the activation of transcription factors varies depending on the signaling pathway, Erk1 and Erk2 are activated

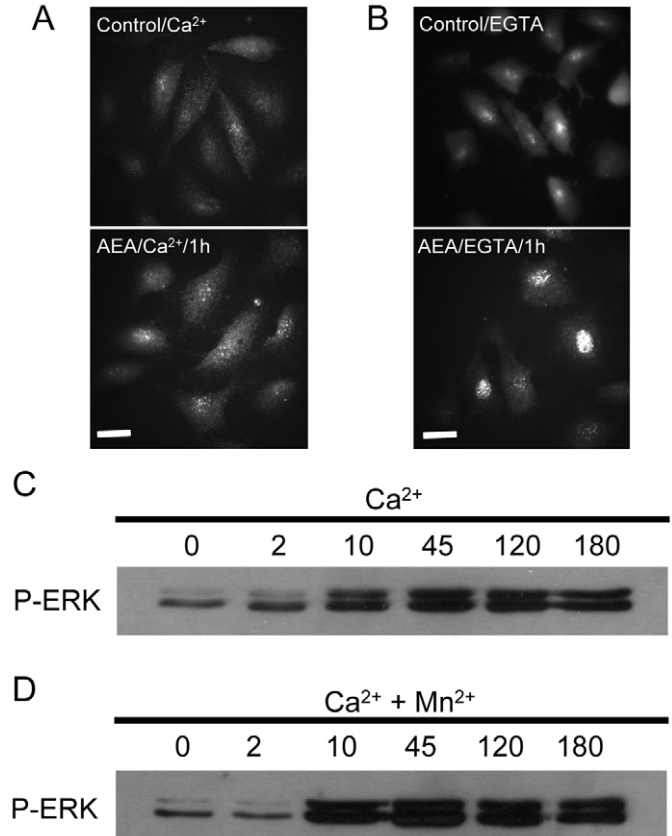

**Fig. 9.** Anandamide-induced  $\text{Ca}^{2+}$  signal subsequently activates NFAT, Erk1 and Erk2. (A,B) The effect of 10  $\mu\text{M}$  anandamide on the (trans)location of GFP-tagged NFAT was visualized in endothelial cells in the presence (A) or absence (B) of 2 mM extracellular  $\text{Ca}^{2+}$ . (C,D) Time dependency of the effect of 10  $\mu\text{M}$  anandamide on Erk1 and Erk2 phosphorylation in endothelial cells in 2 mM  $\text{Ca}^{2+}$ -containing buffer in the absence (C) or presence (D) of 70  $\mu\text{M}$   $\text{Mn}^{2+}$ . Images of endothelial cells that were transiently transfected with NFAT-GFP were taken 48 hours after transfection using a conventional fluorescence microscope. Data presented are representative for at least eight cells out of three experiments on alternate days. Scale bars: 10  $\mu\text{m}$ . For assessment of Erk1 and Erk2 activation, standard western blotting was applied.

under all circumstances (Fig. 10). Although the physiological consequences of these concomitant and interrelated signaling pathways in response to anandamide in endothelial cells are unclear and need to be further explored, the crucial role of integrin-clustering may point to a circumstance-dependent bivalent contribution of this endocannabinoid to cell stimulation, proliferation, angiogenesis and/or migration under conditions such like inflammation, permeability or hypoxia.

## Receptor(s) involved in anandamide-induced endothelial cell activation

Endocannabinoids interact with two cannabinoid receptors identified by molecular cloning: CB $_1$ R, which is expressed predominantly in the brain (Matsuda et al., 1990) but is also present in peripheral tissues (Shire et al., 1995), and CB $_2$ R, expressed mainly by cells of the immune system (Munro et al., 1993) but also calf pulmonary aortic endothelial cells (Zoratti et al., 2003). In human and murine vasculature, the actions of endogenous cannabinoids have been widely interpreted as being mediated by CB $_1$ R, although there is a

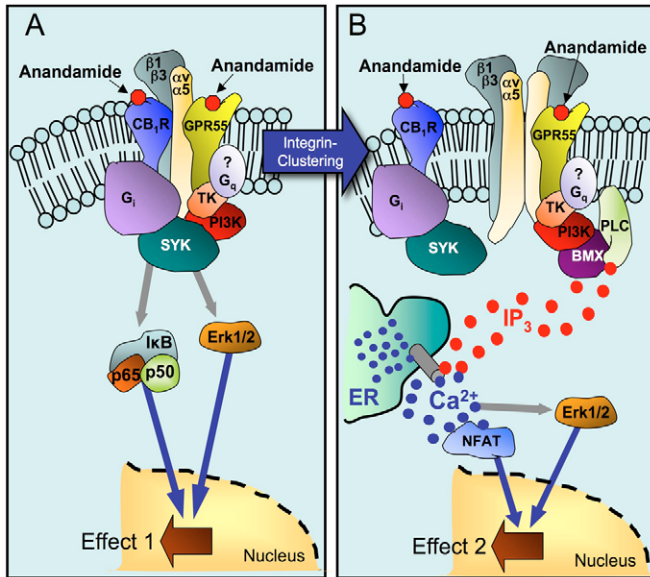

**Fig. 10.** Schemes of the two signaling cascades activated by anandamide in endothelial cells. (A) Anandamide-induced Ca<sup>2+</sup> signaling under conditions of unclustered integrins originates from CB<sub>1</sub>R that is linked to β1 integrin and stimulates Syk via G<sub>α<sub>i</sub></sub>, subsequently resulting in the activation of NFκB, Erk1 and Erk2. Additionally, Syk inhibits PI3K and, thus, the downstream signaling of the GPR55 is prevented. (B) Once integrins are clustered, CB<sub>1</sub>R uncouples from β1 integrin and, thus, no negative feedback on PI3K via Syk occurs. Consequently, GPR55-initiated signaling becomes promoted, resulting in the activation of a PI3K-Bmx-PLC<sub>γ</sub> cascade that triggers in the production of IP<sub>3</sub> and subsequent intracellular Ca<sup>2+</sup> mobilization, yielding activation of NFAT, Erk1 and Erk2. Based on the data presented, involvement of G<sub>q/s</sub> in GPR55-triggered signaling cannot be not confirmed or excluded at this stage. Abbreviations: α1β3, α1β3 integrin; α<sub>v</sub>β3, α<sub>v</sub>β3 integrin; Bmx/Etk, bone marrow kinase, X-linked/epithelial and endothelial tyrosine kinase; CB<sub>1</sub>R, cannabinoid 1 receptor; ER, endoplasmic reticulum; Erk1/2, extracellular signal regulated kinases 1 and 2; GPR55, G-protein-coupled receptor 55 (e-aR, 'atypical' endothelial anandamide receptor); IP<sub>3</sub>, Ins(1,4,5)P<sub>3</sub>; G<sub>i</sub>, G<sub>i</sub> protein; G<sub>q</sub>, G<sub>q</sub> (G<sub>α13</sub>) protein; NFAT, nuclear factor of activated T-cells; NFκB, nuclear factor κB; p50, nuclear factor κB p50; p65, nuclear factor κB, subunit 3; PI3K, phosphoinositide 3-kinase; PLC, phospholipase C; Syk, spleen tyrosine kinase; Tk, tyrosine kinase.

growing amount of evidence, particularly in isolated heart and blood vessel preparations, that another cannabinoid receptor, referred as e-aR may exist (Offertaler et al., 2003).

Our findings that, despite the presence of CB<sub>1</sub>R, its very selective synthetic agonist HU210 [(6aR)-trans-3-(1,1-dimethylheptyl)-6a,7,10,10a-tetrahydro-1-hydroxy-6,6-dimethyl-6H-dibenzo[b,d]pyran-9-methanol] (Felder et al., 1995) failed to stimulate intracellular Ca<sup>2+</sup> signaling while the e-aR agonist O1602 (Bukoski et al., 2002; Jarai et al., 1999) evoked a strong Ca<sup>2+</sup> signal in Ca<sup>2+</sup> containing solution, indicate that anandamide-triggered Ca<sup>2+</sup> signaling is mediated by e-aR in the human umbilical vein-derived endothelial cell line used in this study. However, anandamide failed to induce a Ca<sup>2+</sup> signal in the presence of extracellular Ca<sup>2+</sup>. Accordingly, this points to a repressive effect of CB<sub>1</sub>R-originated signal transduction on signaling pathways beyond e-aR. This hypothesis was further confirmed by our findings that activation of CB<sub>1</sub>R with HU210 strongly diminished the O1602-initiated Ca<sup>2+</sup> signal. Notably, caution is advised on the specificity of CBR antagonist/agonists, and, thus, additional efforts to characterize involved receptors were undertaken.

However, in the absence of external Ca<sup>2+</sup>, anandamide initiated strong cytosolic Ca<sup>2+</sup> signaling. Notably, this signal was insensitive to the CB<sub>2</sub>R antagonist SR144528 but was prevented by rimonabant, an inhibitor of CB<sub>1</sub>R as well as of e-aR (Offertaler et al., 2003). Importantly, as O1918, the antagonist of the e-aR (Jarai et al., 1999; Mo et al., 2004; Offertaler et al., 2003), prevented anandamide-induced Ca<sup>2+</sup> signaling in the absence of external Ca<sup>2+</sup>, these data indicate that in the nominal absence of extracellular Ca<sup>2+</sup> the CB<sub>1</sub>R-originated suppressive effect is uncoupled from the e-aR pathway, and, thus, allows the generation of a Ca<sup>2+</sup> signal. Hence, using RT-PCR and siRNA, the putative anandamide receptor GPR55 (Brown, 2007; Hiley and Kaup, 2007; Ryberg et al., 2007) was identified as the e-aR. Hence, overexpression of GPR55 strongly increased Ca<sup>2+</sup> signaling upon anandamide and O1602 treatment in Ca<sup>2+</sup>-free and Ca<sup>2+</sup>-containing buffer, respectively. However, the potency of anandamide was less in this study than previously reported (Ryberg et al., 2007), which may be due to the different cell models (i.e. transfected HEK 293 cells versus endothelial cells). Hence, lysophosphatidylinositol, a recently described agonist of the GPR55 (Oka et al., 2007), was found to trigger Ca<sup>2+</sup> signaling via constitutive GPR55 in endothelial cells. Accordingly, there are several questions arising: first, how does the e-aR/GPR55 trigger Ca<sup>2+</sup> signaling; second, what is the molecular mechanism of the CB<sub>1</sub>R-mediated suppressive effect on anandamide-induced Ca<sup>2+</sup> signaling; third, why and how is the Ca<sup>2+</sup> signal via e-aR/GPR55 shielded from CB<sub>1</sub>R-mediated suppression in the absence of extracellular Ca<sup>2+</sup>; and, fourth, what are the physiological consequences of both signaling pathways for transcriptional control in endothelial cells?

#### GPR55 interacts with integrins and triggers Ca<sup>2+</sup> signaling via PI3K and Bmx

In the absence of extracellular Ca<sup>2+</sup>, integrins might be involved in the transition of GPR55-originated signaling that yields intracellular Ca<sup>2+</sup> mobilization from the ER (Fig. 10B). In particular, the inhibitory properties of the crosslinking antibody against α<sub>v</sub>β3 integrin [LM609 (Charo et al., 1990; Cheresch, 1987)] and the functional-blocking antibodies against the β1 [JB1A (Mohri et al., 1996)] and β3 subunits [B3A (Vignali et al., 1990)] on anandamide/O1602-induced Ca<sup>2+</sup> signaling fuel the hypothesis that, upon anandamide/O1602 stimulation, GPR55 interacts with α<sub>v</sub>β3 and α<sub>5</sub>β1 integrins, which is prerequisite to transmitting outside-in signaling towards intracellular downstream targets (Fig. 10A). This conclusion is further supported by the inhibitory effects of fibronectin (Rupp and Little, 2001) or its integrin-binding motif RGD (Bar-Shavit et al., 1991; Ruoslahti, 2003; Ruoslahti and Pierschbacher, 1987) on anandamide/O1602-induced Ca<sup>2+</sup> signaling. The importance of integrin clustering was additionally confirmed by our results that the inhibition of ROCK, which is required for clustering of the integrins (Rodriguez-Fernandez et al., 2001), by Y27632 (Uehata et al., 1997) strongly diminished anandamide-induced Ca<sup>2+</sup> signaling.

Anandamide-induced Ca<sup>2+</sup> signaling in Ca<sup>2+</sup>-free medium was sensitive to the inhibition of PI3K, PLC and the Ins(1,4,5)P<sub>3</sub> receptor. Thus, the involvement of PI3K upstream of PLC activation and Ins(1,4,5)P<sub>3</sub>-mediated intracellular Ca<sup>2+</sup> mobilization can be assumed (Fig. 10B). The 70-80 kDa protein Bmx/Etk, a unique tyrosine kinase of the Tec family in endothelial and epithelial cells (Takesono et al., 2002), was identified as mediator between PI3K and PLC. PI3K-induced activation of Bmx/Etk has been described in prostate cancer cells and in breast cancer cells (Bagheri-Yarmand

et al., 2001; Qiu et al., 1998). In support of this, the Tec family inhibitor LFM-A13 (Chau et al., 2002; Mahajan et al., 1999), as well as Bmx/Etk-targeted siRNA inhibited anandamide- and O1602-induced  $\text{Ca}^{2+}$  signaling. Our data that the wide-range tyrosine kinase inhibitors PP1 and PP2 (Liu et al., 1999) abolished anandamide- and O1602-induced  $\text{Ca}^{2+}$  signaling, and the enhanced tyrosine phosphorylation lead us to suggest that Bmx/Etk undergoes tyrosine phosphorylation by Src family kinases.

Overall, our data point to anandamide-triggered  $\text{Ca}^{2+}$  signaling as the apparent result of a signaling cascade starting with anandamide binding to GPR55 that clusters with  $\alpha\text{v}\beta\text{3}$  and  $\alpha\text{5}\beta\text{1}$  integrins to transmit outside-in signaling, leading to PI3K-mediated activation/translocation of Bmx/Etk. After Bmx/Etk phosphorylation by a member of the Src family (Stephens et al., 2001), it activates PLC $\gamma$  (Qin and Chock, 2001) that, in turn, instigates  $\text{Ins}(1,4,5)\text{P}_3$ -triggered intracellular  $\text{Ca}^{2+}$  mobilization from the ER (Fig. 10B).

#### CB<sub>1</sub>-receptor mediated suppression on anandamide-triggered $\text{Ca}^{2+}$ signaling is mediated via $\text{G}\alpha_{i/o}$ and Syk

Notably, inhibition of  $\text{G}\alpha_{i/o}$  by pertussis toxin unmasked intracellular  $\text{Ca}^{2+}$  signaling upon anandamide in the presence of extracellular  $\text{Ca}^{2+}$ , pointing to the involvement of  $\text{G}\alpha_{i/o}$  downstream of CB<sub>1</sub>R (Howlett et al., 2002) in a negative-feedback loop that prevents intracellular  $\text{Ca}^{2+}$  signaling upon anandamide under these conditions (Fig. 10A).

A potential executor of the inhibitory effects on GPR55-PI3K-Bmx signaling downstream of CB<sub>1</sub>R and  $\text{G}\alpha_{i/o}$  is Syk. This tyrosine kinase with splicing variants of ~72 kDa and ~68 kDa (Wang et al., 2003) inhibits activation of PI3K in breast cancer cells (Mahabeleshwar and Kundu, 2003) and is expressed in endothelial cells (Inatome et al., 2001). Accordingly, the long form of Syk could be found in the human endothelial cell line used for this study. Moreover, selective inhibition of Syk by piceatannol (Ashikawa et al., 2002) and the respective siRNA unmasked anandamide-triggered  $\text{Ca}^{2+}$  signaling in the presence of extracellular  $\text{Ca}^{2+}$ . Additionally, wortmannin-resistant tyrosine phosphorylation of a 70–80 kDa protein was found in response to anandamide in the presence but not absence of extracellular  $\text{Ca}^{2+}$ . These data indicate that endothelial Syk indeed executes repression of anandamide-triggered  $\text{Ca}^{2+}$  signaling downstream to CB<sub>1</sub>R and  $\text{G}\alpha_{i/o}$  (Fig. 10A).

#### Integrins shield GPR55-triggered signaling from CB<sub>1</sub>R-controlled suppression

Neither NMR spectroscopy nor anandamide uptake experiments provided evidence for a  $\text{Ca}^{2+}$ -anandamide chelate to prevent binding/uptake of free anandamide and, thus,  $\text{Ca}^{2+}$  signaling in the presence of extracellular  $\text{Ca}^{2+}$ . Therefore, we speculated that the interaction of extracellular  $\text{Ca}^{2+}$  with cell membrane constituents is responsible for the observed inhibitory effect of extracellular  $\text{Ca}^{2+}$  on anandamide-induced  $\text{Ca}^{2+}$  signaling in endothelial cells. Hence, the existence of a rather specific  $\text{Ca}^{2+}$ -binding site was further supported by the findings that the  $\text{Ca}^{2+}$  surrogates  $\text{Sr}^{2+}$  and  $\text{Ba}^{2+}$  also prevented anandamide-induced  $\text{Ca}^{2+}$  signaling in a concentration-dependent manner. Notably, the  $\text{IC}_{50}$  value of  $\text{Ca}^{2+}$  (~8  $\mu\text{M}$ ) to prevent anandamide-triggered  $\text{Ca}^{2+}$  signaling is strikingly similar to that found for  $\text{Ca}^{2+}$ -induced inhibition of integrin clustering (Leitinger et al., 2000; Leitinger et al., 1999). Consequently, the involvement of these dynamically regulated transmembrane heteromultimers in unmasking GPR55-triggered  $\text{Ca}^{2+}$  signaling in the absence of extracellular  $\text{Ca}^{2+}$  was postulated.

Clustered integrins (i.e. in the absence of extracellular  $\text{Ca}^{2+}$ ) may protect GPR55-initiated signaling against the repressive effects of CB<sub>1</sub>R-originated pathways. In line with this assumption,  $\text{Mn}^{2+}$ , a potent activator of integrin clustering (Mould et al., 1998; Smith and Cheresch, 1990; Thamilselvan et al., 2003), allowed anandamide-induced  $\text{Ca}^{2+}$  signaling even in the presence of extracellular  $\text{Ca}^{2+}$ , while  $\text{Mn}^{2+}$  did not induce any  $\text{Ca}^{2+}$  signal by itself.

In addition, binding of CB<sub>1</sub>R to the  $\beta\text{1}$ -integrin subunit was released upon anandamide only if integrins were clustered, which further supports the concept that clustering of integrins shields anandamide-induced PI3K-Bmx-PLC $\gamma$ - $\text{Ca}^{2+}$  signaling from the inhibitory effect of CB<sub>1</sub>R activation (Fig. 10). Besides CB<sub>1</sub>R, phospho-Syk was also found to interact directly with the cytoplasmic domain of  $\beta\text{1}$ -,  $\beta\text{2}$ - and  $\beta\text{3}$ -integrin subunits (Woodside et al., 2002).

Accordingly, the interaction of CB<sub>1</sub>R and Syk with inactive (i.e. unclustered)  $\beta\text{1}$  integrin might either disturb the cytoplasmic integrin rearrangement necessary to transmit the GPR55-initiated signal to its downstream target or allow Syk-mediated inhibition of PI3K owing to the proximity of both proteins (Fig. 10A). However, once integrins cluster either by activation of ROCK, extracellular  $\text{Mn}^{2+}$  or removal of extracellular  $\text{Ca}^{2+}$ , CB<sub>1</sub>R and Syk are released from  $\beta\text{1}$  integrin and no further suppression of PI3K occurs, thus allowing GPR55-originated  $\text{Ca}^{2+}$  signaling to be transmitted (Fig. 10B). Though the involvement of a  $\text{G}\alpha_{13}$  in GPR55-triggered  $\text{Ca}^{2+}$  signaling (Ryberg et al., 2007) seem unlikely in the cells used, owing to the involvement of integrins, it cannot be excluded.

In contrast to anandamide that binds to CB<sub>1</sub>R and GPR55, activation of GPR55 only by either O1602 or LPI yielded  $\text{Ca}^{2+}$  signaling independently of extracellular  $\text{Ca}^{2+}$ , thus indicating that the negative feedback by CB<sub>1</sub>R needs to be activated in order to achieve inhibition of the GPR55-originated pathway.

#### Transcription factor activation upon anandamide depends on the signaling pathway activated

Syk induces tyrosine phosphorylation of I $\kappa\text{B}\alpha$ , causing dissociation, phosphorylation and nuclear translocation of the p65 subunit of NF $\kappa\text{B}$  (Takada et al., 2003). This is in line with the data indicating that, in the presence of extracellular  $\text{Ca}^{2+}$ , anandamide triggered nuclear translocation of p65 (Fig. 10A). However, under conditions of clustered integrins, anandamide failed to evoke the translocation of p65. The lack of NF $\kappa\text{B}$  activation under these conditions is consistent with reports pointing to the importance of  $\text{Ca}^{2+}$  oscillation for the activation of this transcription factor (Hu et al., 1999). By contrast, nuclear translocation of  $\text{Ca}^{2+}$ /calcineurin activated NFAT (Clipstone and Crabtree, 1992; Loh et al., 1996) upon stimulation with anandamide was exclusively obtained under conditions of clustered integrins (Fig. 10B). These findings are in agreement with our previous report that intracellular  $\text{Ca}^{2+}$  mobilization activates NFAT in human endothelial cells (Bochkov et al., 2002). Notably, although the contribution of NF $\kappa\text{B}$  and NFAT to gene expression and regulation of cell function often overlaps, there are considerable differences as NF $\kappa\text{B}$  is frequently referred to as being involved in endothelial cell apoptosis (von Albertini et al., 1998) and the initiation of inflammatory processes (Badrichani et al., 1999), while NFAT has been implicated in angiogenesis (Qin et al., 2006) and cell growth (Li et al., 2005).

Interestingly, anandamide-activated mitogenic signaling results in phosphorylation of Erk1 and Erk2 under all conditions, which is consistent with frequent reports that integrins and cannabinoid receptors induce mitogen-activated protein kinase (MAPK)



signaling pathways (Liu et al., 2000). The phenomenon of Erk1 and Erk2 phosphorylation under the various conditions (i.e. with and without Ca<sup>2+</sup> signaling) might be related to the activation of different pathways, resulting in phosphorylation of Erk1 and Erk2. Consistently, Syk stimulates Erk1 and Erk2 via the Ras-MAPK pathway (Kawakami et al., 2003) but also Ca<sup>2+</sup> that is known to influence cell proliferation and differentiation (Berridge et al., 2000a; Berridge et al., 2000b) stimulates the Ras-MAPK pathway (Cullen and Lockyer, 2002).

In addition to such alternative activation of distinct transcription factors, the observed GPR55-triggered Ca<sup>2+</sup> signaling may also mediate Ca<sup>2+</sup>-sensitive cell functions such as activation of nitric oxide synthase, formation of prostaglandins or endothelium-derived hyperpolarizing factor (Graier et al., 1994), proliferation (Munaron, 2002), or permeability (Tiruppathi et al., 2006). Accordingly, depending on the status of integrins, anandamide initiates alternate processes in endothelial cells that may even lead to opposite cell functions (e.g. apoptosis versus cell proliferation).

Although both signaling cascades and their mutual interrelation could be described in herein, important questions still remain to be answered. What are the events that favor one of the two alternative signaling pathways? What are the physiological and/or pathological consequences of the respective signaling cascades? Particularly in view of the known initiators of integrin clustering such as inflammation (Staunton et al., 2006), adhesion (Shattil and Newman, 2004) and migration (Lindbom and Werr, 2002), the physiological implication of the dual signaling induced by anandamide in endothelial cells urges its investigation.

## Materials and Methods

### Chemicals, supplies and materials

Fura-2/AM was from Molecular Probes Europe (Leiden, Netherlands). <sup>3</sup>H-anandamide was obtained from APB (Vienna, Austria). Anandamide (arachidonylethanolamide), R-(+)-methanandamide, U73122, 2APB, LMF-A13, HU210 and piceatannol were purchased from Tocris Cookson (Northpoint, Avonmouth, Bristol, UK). O1602, O1918 and AM251 were from Cayman Europe (Tallinn, Estonia). SRI144528 and rimonabant were kind gifts from Sanofi-Recherche (Monpellier, France). Bradykinin, arachidonic acid, ATP and lysophosphatidylinositol were from Sigma Chemicals (St Louis, MO, USA). RNeasy Mini kit and the EndoFree Plasmid Maxi kit were purchased from Qiagen (VWR, Vienna, Austria). RQ1 RNase-free DNase I and TransFas were from Promega (Mannheim, Germany). RNAGuard and random hexamer primers were from APB. First-strand buffer, moloney murine leukemia virus reverse transcriptase, cell culture media and media substitutes were obtained from Life Technologies (Gibco, Invitrogen, Vienna, Austria). Fetal calf serum was from PAA (Linz, Austria). DyNAzyme II DNA polymerase was from Finnzymes Oy (Vienna, Austria). Primers were synthesized at MWG Biotech (Ebersberg, Germany). Restriction enzymes and T4 DNA ligase were purchased at New England Biolabs (Frankfurt, Germany) or Promega. The expression vectors pcDNA 3 and pBudCE4.1 were obtained from Invitrogen (Vienna, Austria). The dNTPs and all other chemicals were from Roth (Karlsruhe, Germany). The CB1R antibody (H-150) was from Santa Cruz Biotechnology (Heidelberg, Germany). Antibodies for  $\beta$ 1 integrin (JB1A) and  $\alpha$ V integrin (SAM-1) were obtained from Biomedica/Chemicon (Millipore, Vienna, Austria) and Protein G Sepharose 4 Fast Flow for immunoprecipitation was from GE Healthcare (Vienna, Austria).

### Cell culture and transfection

The human umbilical vein derived endothelial cell line, EA.hy926 (Edgell et al., 1983) at over 45 passages was grown in DMEM containing 10% FCS and 1% HAT. In addition, we have performed experiments in short-term cultured human umbilical vein endothelial cells and human uterine artery endothelial cells (Trenker et al., 2007). If necessary, dishes were coated with 20  $\mu$ g/ml fibronectin (Short et al., 1998). Transient transfection was performed using Transfast according to the manufacturer's protocol.

### Reverse transcriptase-PCR

Total RNA was isolated using the RNeasy Mini Kit according to the manufacturer's protocol and subjected to RT-PCR as described previously (Zoratti et al., 2003). The identity of all PCR products was verified on TAE agarose gels and was further confirmed by automated sequencing of the isolated PCR.

### Reduction of gene expression by siRNA

The siRNA against human Bmx/Etk was selected at position 1482 bp of the human mRNA and ligated into pSuppressor using the *SalI/XbaI* sites. For identification of siRNA-expressing cells, the U6 promotor and Bmx/Etk or Syk siRNA were cloned into pBudCE4.1 encoding mtDsRed (Malli et al., 2003) via *KpnI/XhoI* at the second multicloning site. The siRNA against human Syk in pSuppressor was purchased by Imgenex. siRNA against GPR55 was from Quiagen (Hs\_GPR55\_5\_HP). The efficiency of siRNAs and of an appropriate negative control was approved by real-time PCR (supplementary material Fig. S2E; see Fig. 4A).

### Western blot analysis

EA.hy926 cells were scraped in lysis buffer and disrupted by three cycles of freezing/thawing. Equal amounts of total protein were subjected to western blot and detected by enhanced chemiluminescence as previously described (Schaeffer et al., 2003). If required, membranes were stripped with 0.1 M glycine (pH 2.5), and re-probed.

### Immunoprecipitation

Cell lysates were incubated with 2–5  $\mu$ g (200  $\mu$ g/ml) of specific antibody overnight. The obtained immune complexes were precipitated with Protein G Sepharose 4 Fast Flow, according to the manufacturer's protocol and subjected to western blot analyses.

### Immunohistochemistry

Fixed and permeabilized cells grown on glass cover were incubated overnight at 4°C with anti-NFAT antibody. After incubation with Alexa Fluor 488 secondary antibody (2  $\mu$ g/ml), the glass cover slips were sealed and fluorescence was visualized using deconvolution microscopy.

### Measurement of tyrosine kinase activity

Tyrosine kinase activity was monitored in single endothelial cells using a probe for tyrosine phosphorylation of the CrkII adaptor protein [Picchu-936X (Kurokawa et al., 2001)], as previously described (Schaeffer et al., 2003).

### Cytosolic free Ca<sup>2+</sup> measurements

Cytosolic free-Ca<sup>2+</sup> was measured using Fura2/AM as previously described (Frieden et al., 2002; Malli et al., 2005; Trenker et al., 2007). [Ca<sup>2+</sup>]<sub>cyto</sub> was expressed as (F<sub>340</sub>/F<sub>380</sub>)/F<sub>0</sub>.

### FRET measurement of endoplasmic free-Ca<sup>2+</sup> concentration and kinase activity

Tyrosine kinase activity was monitored in single endothelial cells using a probe for tyrosine phosphorylation of the CrkII adaptor protein [Picchu-936X (Kurokawa et al., 2001)] as previously described (Schaeffer et al., 2003). For the assessment of the intraluminal free-Ca<sup>2+</sup> concentration of the ER, cells were transiently transfected with Cam4<sub>er</sub> and measurements were performed as described previously (Frieden et al., 2002; Malli et al., 2003; Malli et al., 2005). FRET-based sensors were excited at 440 nm (440AF21, Omega Optical, Brattleboro, VT, USA) and emission was collected simultaneously at 535 and 480 nm using an optical beam splitter (Dual-View MicroImager, Optical Insights, VisiTron Systems, Puchheim, Germany). Kinase activity or alterations in ER Ca<sup>2+</sup> were expressed as (F<sub>535</sub>/F<sub>480</sub>)/F<sub>0</sub>.

We thank Beatrix Petschar and Anna Schreilechner for their excellent technical assistance, R. Tsien (University of California, San Diego, CA) for Cam4<sub>er</sub>, M. Matsuda and A. Miyawaki (Riken, Wako, Saitama, Japan) for providing the Picchu-936X constructs, Tullio Pozzan (University Padova, Padova, Italy) for mtDsRed, and C. J. S. Edgell (University of North Carolina, Chapel Hill, NC) for the EA.hy926 cells. The expression vector for p65-GFP was a gift from J. Schmid (Medical University of Vienna, Vienna, Austria). We also thank Andrew Irving (University of Dundee, UK) for the 3xHA-GPR55 cDNA. This work was supported by the Austrian Funds (P16860-B09, P20181-B05 and SFB F3010-B05) and by the Franz Lanyar Foundation at the Medical University of Graz. The Institute of Medical Molecular Biology and Biochemistry was supported by the infrastructure program (UGP4) of the Austrian ministry of education, science and culture. Nariman Balenga was supported by a PhD Fellowship in PhD Program Molecular Medicine at the Medical University of Graz.

## References

- Aschner, J. L., Lum, H., Fletcher, P. W. and Malik, A. B. (1997). Bradykinin- and thrombin-induced increases in endothelial permeability occur independently of phospholipase C but require protein kinase C activation. *J. Cell. Physiol.* 173, 387–396.
- Ashikawa, K., Majumdar, S., Banerjee, S., Bharti, A. C., Shishodia, S. and Aggarwal, B. B. (2002). Piceatannol inhibits TNF-induced NF-kappaB activation and NF-kappaB-



- mediated gene expression through suppression of I $\kappa$ B kinase and p65 phosphorylation. *J. Immunol.* **169**, 6490-6497.
- Badrichani, A. Z., Stroka, D. M., Bilbao, G., Curiel, D. T., Bach, F. H. and Ferran, C.** (1999). Bcl-2 and Bcl-XL serve an anti-inflammatory function in endothelial cells through inhibition of NF- $\kappa$ B. *J. Clin. Invest.* **103**, 543-553.
- Bagheri-Yarmand, R., Mandal, M., Taludker, A. H., Wang, R. A., Vadlamudi, R. K., Kung, H. J. and Kumar, R.** (2001). Etk/Bmx tyrosine kinase activates Pak1 and regulates tumorigenicity of breast cancer cells. *J. Biol. Chem.* **276**, 29403-29409.
- Baker, D., Pryce, G., Davies, W. L. and Hiley, C. R.** (2006). In silico patent searching reveals a new cannabinoid receptor. *Trends Pharmacol. Sci.* **27**, 1-4.
- Bar-Shavit, R., Sabbah, V., Lampugnani, M. G., Marchisio, P. C., Fenton, J. W., 2nd, Vlodavsky, I. and Dejana, E.** (1991). An Arg-Gly-Asp sequence within thrombin promotes endothelial cell adhesion. *J. Cell Biol.* **112**, 335-344.
- Berridge, M. J., Lipp, P. and Bootman, M. D.** (2000a). Signal transduction. The calcium entry pas de deux. *Science* **287**, 1604-1605.
- Berridge, M. J., Lipp, P. and Bootman, M. D.** (2000b). The versatility and universality of calcium signalling. *Nat. Rev. Mol. Cell Biol.* **1**, 11-21.
- Bleasdale, J. E., Thakur, N. R., Gremban, R. S., Bundy, G. L., Fitzpatrick, F. A., Smith, R. J. and Bunting, S.** (1990). Selective inhibition of receptor-coupled phospholipase C-dependent processes in human platelets and polymorphonuclear neutrophils. *J. Pharmacol. Exp. Ther.* **255**, 756-768.
- Bochkov, V. N., Mechtcheriakova, D., Lucerna, M., Huber, J., Malli, R., Graier, W. F., Hofer, E., Binder, B. R. and Leitinger, N.** (2002). Oxidized phospholipids stimulate tissue factor expression in human endothelial cells via activation of ERK/EGR-1 and Ca<sup>2+</sup>/NFAT. *Blood* **99**, 199-206.
- Boudaka, A., Worl, J., Shiina, T., Neuhuber, W. L., Kobayashi, H., Shimizu, Y. and Takewaki, T.** (2007). Involvement of TRPV1-dependent and -independent components in the regulation of vagally induced contractions in the mouse esophagus. *Eur. J. Pharmacol.* **556**, 157-165.
- Brown, A. J.** (2007). Novel cannabinoid receptors. *Br. J. Pharmacol.* **152**, 567-575.
- Bukoski, R. D., Batkai, S., Jarai, Z., Wang, Y., Offertaler, L., Jackson, W. F. and Kunos, G.** (2002). CB<sub>1</sub> receptor antagonist SR141716A inhibits Ca<sup>2+</sup>-induced relaxation in CB<sub>1</sub> receptor-deficient mice. *Hypertension* **39**, 251-257.
- Charo, I. F., Nannizzi, L., Smith, J. W. and Cheresch, D. A.** (1990). The vitronectin receptor alpha v beta 3 binds fibronectin and acts in concert with alpha 5 beta 1 in promoting cellular attachment and spreading on fibronectin. *J. Cell Biol.* **111**, 2795-2800.
- Chau, C. H., Chen, K. Y., Deng, H. T., Kim, K. J., Hosoya, K., Terasaki, T., Shih, H. M. and Ann, D. K.** (2002). Coordinating Etk/Bmx activation and VEGF upregulation to promote cell survival and proliferation. *Oncogene* **21**, 8817-8829.
- Chaytor, A. T., Martin, P. E., Evans, W. H., Randall, M. D. and Griffith, T. M.** (1999). The endothelial component of cannabinoid-induced relaxation in rabbit mesenteric artery depends on gap junctional communication. *J. Physiol.* **520**, 539-550.
- Cheresch, D. A.** (1987). Human endothelial cells synthesize and express an Arg-Gly-Asp-directed adhesion receptor involved in attachment to fibrinogen and von Willebrand factor. *Proc. Natl. Acad. Sci. USA* **84**, 6471-6475.
- Clipstone, N. A. and Crabtree, G. R.** (1992). Identification of calcineurin as a key signalling enzyme in T-lymphocyte activation. *Nature* **357**, 695-697.
- Cullen, P. J. and Lockyer, P. J.** (2002). Integration of calcium and Ras signalling. *Nat. Rev. Mol. Cell Biol.* **3**, 339-348.
- De Petrocellis, L., Marini, P., Matias, I., Moriello, A. S., Starowicz, K., Cristino, L., Nigam, S. and Di Marzo, V.** (2007). Mechanisms for the coupling of cannabinoid receptors to intracellular calcium mobilization in rat insulinoma beta-cells. *Exp. Cell Res.* **313**, 2993-3004.
- Deutsch, D. G., Goligorsky, M. S., Schmid, P. C., Krebsbach, R. J., Schmid, H. H., Das, S. K., Dey, S. K., Arreaza, G., Thorup, C., Stefano, G. et al.** (1997). Production and physiological actions of anandamide in the vasculature of the rat kidney. *J. Clin. Invest.* **100**, 1538-1546.
- Di Marzo, V., De Petrocellis, L., Fezza, F., Ligresti, A. and Bisogno, T.** (2002). Anandamide receptors. *Prostaglandins Leukot. Essent. Fatty Acids* **66**, 377-391.
- Edgell, C. J., McDonald, C. C. and Graham, J. B.** (1983). Permanent cell line expressing human factor VIII-related antigen established by hybridization. *Proc. Natl. Acad. Sci. USA* **80**, 3734-3737.
- Felder, C. C., Joyce, K. E., Briley, E. M., Mansouri, J., Mackie, K., Blond, O., Lai, Y., Ma, A. L. and Mitchell, R. L.** (1995). Comparison of the pharmacology and signal transduction of the human cannabinoid CB<sub>1</sub> and CB<sub>2</sub> receptors. *Mol. Pharmacol.* **48**, 443-450.
- Fischbach, T., Greffrath, W., Nawrath, H. and Treede, R. D.** (2007). Effects of anandamide and noxious heat on intracellular calcium concentration in nociceptive drg neurons of rats. *J. Neurophysiol.* **98**, 929-938.
- Fowler, C. J., Jonsson, K. O., Andersson, A., Juntunen, J., Jarvinen, T., Vandevoorde, S., Lambert, D. M., Jerman, J. C. and Smart, D.** (2003). Inhibition of C6 glioma cell proliferation by anandamide, 1-arachidonoylglycerol, and by a water soluble phosphate ester of anandamide: variability in response and involvement of arachidonic acid. *Biochem. Pharmacol.* **66**, 757-767.
- Frieden, M., Malli, R., Samardzija, M., Demaurex, N. and Graier, W. F.** (2002). Subplasmalemmal endoplasmic reticulum controls K(Ca) channel activity upon stimulation with a moderate histamine concentration in a human umbilical vein endothelial cell line. *J. Physiol.* **540**, 73-84.
- Geahlen, R. L. and McLaughlin, J. L.** (1989). Piceatannol (3,4,3',5'-tetrahydroxy-trans-stilbene) is a naturally occurring protein-tyrosine kinase inhibitor. *Biochem. Biophys. Res. Commun.* **165**, 241-245.
- Graier, W. F., Sturek, M. and Kukovetz, W. R.** (1994). Ca<sup>2+</sup> regulation and endothelial vascular function. *Endothelium* **1**, 223-236.
- Grainger, J. and Boachie-Ansah, G.** (2001). Anandamide-induced relaxation of sheep coronary arteries: the role of the vascular endothelium, arachidonic acid metabolites and potassium channels. *Br. J. Pharmacol.* **134**, 1003-1012.
- Griffin, G., Tao, Q. and Abood, M. E.** (2000). Cloning and pharmacological characterization of the rat CB<sub>2</sub> cannabinoid receptor. *J. Pharmacol. Exp. Ther.* **292**, 886-894.
- Hanke, J. H., Gardner, J. P., Dow, R. L., Changelian, P. S., Brissette, W. H., Weringer, E. J., Pollok, B. A. and Connelly, P. A.** (1996). Discovery of a novel, potent, and Src family-selective tyrosine kinase inhibitor. Study of Lck- and FynT-dependent T cell activation. *J. Biol. Chem.* **271**, 695-701.
- Hiley, C. R. and Kaup, S. S.** (2007). GPR55 and the vascular receptors for cannabinoids. *Br. J. Pharmacol.* **152**, 559-561.
- Hillard, C. J.** (2000). Endocannabinoids and vascular function. *J. Pharmacol. Exp. Ther.* **294**, 27-32.
- Hoi, P. M. and Hiley, C. R.** (2006). Vasorelaxant effects of oleamide in rat small mesenteric artery indicate action at a novel cannabinoid receptor. *Br. J. Pharmacol.* **147**, 560-568.
- Howlett, A. C., Barth, F., Bonner, T. I., Cabral, G., Casellas, P., Devane, W. A., Felder, C. C., Herkenham, M., Mackie, K., Martin, B. R. et al.** (2002). International Union of Pharmacology. XXVII. Classification of cannabinoid receptors. *Pharmacol. Rev.* **54**, 161-202.
- Hu, Q., Deshpande, S., Irani, K. and Ziegelstein, R. C.** (1999). [Ca<sup>2+</sup>]<sub>i</sub> oscillation frequency regulates agonist-stimulated NF- $\kappa$ B transcriptional activity. *J. Biol. Chem.* **274**, 33995-33998.
- Inatome, R., Yanagi, S., Takano, T. and Yamamura, H.** (2001). A critical role for Syk in endothelial cell proliferation and migration. *Biochem. Biophys. Res. Commun.* **286**, 195-199.
- Jarai, Z., Wagner, J. A., Varga, K., Lake, K. D., Compton, D. R., Martin, B. R., Zimmer, A. M., Bonner, T. I., Buckley, N. E., Mezey, E. et al.** (1999). Cannabinoid-induced mesenteric vasodilation through an endothelial site distinct from CB<sub>1</sub> or CB<sub>2</sub> receptors. *Proc. Natl. Acad. Sci. USA* **96**, 14136-14141.
- Johns, D. G., Behm, D. J., Walker, D. J., Ao, Z., Shapland, E. M., Daniels, D. A., Riddick, M., Dowell, S., Staton, P. C., Green, P. et al.** (2007). The novel endocannabinoid receptor GPR55 is activated by atypical cannabinoids but does not mediate their vasodilator effects. *Br. J. Pharmacol.* **152**, 825-831.
- Kawakami, Y., Kitaura, J., Yao, L., McHenry, R. W., Kawakami, Y., Newton, A. C., Kang, S., Kato, R. M., Leitges, M., Rawlings, D. J. et al.** (2003). A Ras activation pathway dependent on Syk phosphorylation of protein kinase C. *Proc. Natl. Acad. Sci. USA* **100**, 9470-9475.
- Koganezawa, M. and Shimada, I.** (2002). Inositol 1,4,5-trisphosphate transduction cascade in taste reception of the fleshfly, *Boettcherisca peregrina*. *J. Neurobiol.* **51**, 66-83.
- Kurokawa, K., Mochizuki, N., Ohba, Y., Mizuno, H., Miyawaki, A. and Matsuda, M.** (2001). A pair of fluorescent resonance energy transfer-based probes for tyrosine phosphorylation of the CrkII adaptor protein in vivo. *J. Biol. Chem.* **276**, 31305-31310.
- Lauckner, J. E., Hille, B. and Mackie, K.** (2005). The cannabinoid agonist WIN55,212-2 increases intracellular calcium via CB<sub>1</sub> receptor coupling to Gq/11 G proteins. *Proc. Natl. Acad. Sci. USA* **102**, 19144-19149.
- Leitinger, B., McDowall, A., Stanley, P. and Hogg, N.** (2000). The regulation of integrin function by Ca<sup>2+</sup>. *Biochim. Biophys. Acta* **1498**, 91-98.
- Leitinger, N., Tyner, T. R., Oslund, L., Rizza, C., Subbanagounder, G., Lee, H., Shih, P. T., Mackman, N., Tigyi, G., Territo, M. C. et al.** (1999). Structurally similar oxidized phospholipids differentially regulate endothelial binding of monocytes and neutrophils. *Proc. Natl. Acad. Sci. USA* **96**, 1201-1205.
- Li, J., Tong, Q., Shi, X., Costa, M. and Huang, C.** (2005). ERKs activation and calcium signaling are both required for VEGF induction by vanadium in mouse epidermal C141 cells. *Mol. Cell. Biochem.* **279**, 25-33.
- Lindbom, L. and Werr, J.** (2002). Integrin-dependent neutrophil migration in extravascular tissue. *Semin. Immunol.* **14**, 115-121.
- Liu, S., Calderwood, D. A. and Ginsberg, M. H.** (2000). Integrin cytoplasmic domain-binding proteins. *J. Cell Sci.* **113**, 3563-3571.
- Liu, Y., Bishop, A., Witucki, L., Kraybill, B., Shimizu, E., Tsien, J., Ubersax, J., Blethrow, J., Morgan, D. O. and Shokat, K. M.** (1999). Structural basis for selective inhibition of Src family kinases by PP1. *Chem. Biol.* **6**, 671-678.
- Loh, C., Shaw, K. T., Carew, J., Viola, J. P., Luo, C., Perrino, B. A. and Rao, A.** (1996). Calcineurin binds the transcription factor NFAT1 and reversibly regulates its activity. *J. Biol. Chem.* **271**, 10884-10891.
- Maccarrone, M., Bari, M., Lorenzon, T., Bisogno, T., Di Marzo, V. and Finazzi-Agro, A.** (2000). Anandamide uptake by human endothelial cells and its regulation by nitric oxide. *J. Biol. Chem.* **275**, 13484-13492.
- Mahabeshwar, G. H. and Kundu, G. C.** (2003). Syk, a protein-tyrosine kinase, suppresses the cell motility and nuclear factor kappa B-mediated secretion of urokinase type plasminogen activator by inhibiting the phosphatidylinositol 3'-kinase activity in breast cancer cells. *J. Biol. Chem.* **278**, 6209-6221.
- Mahajan, S., Ghosh, S., Sudbeck, E. A., Zheng, Y., Downs, S., Hupke, M. and Uckun, F. M.** (1999). Rational design and synthesis of a novel anti-leukemic agent targeting Bruton's tyrosine kinase (BTK), LFM-A13 [alpha-cyano-beta-hydroxy-beta-methyl-N-(2,5-dibromophenyl)propanamide]. *J. Biol. Chem.* **274**, 9587-9599.
- Malli, R., Frieden, M., Osibow, K., Zoratti, C., Mayer, M., Demaurex, N. and Graier, W. F.** (2003). Sustained Ca<sup>2+</sup> transfer across mitochondria is essential for mitochondrial Ca<sup>2+</sup> buffering, store-operated Ca<sup>2+</sup> entry, and Ca<sup>2+</sup> store refilling. *J. Biol. Chem.* **278**, 44769-44779.
- Malli, R., Frieden, M., Trenker, M. and Graier, W. F.** (2005). The role of mitochondria for Ca<sup>2+</sup> refilling of the ER. *J. Biol. Chem.* **280**, 12114-12122.

- Maruyama, T., Kanaji, T., Nakade, S., Kanno, T. and Mikoshiba, K. (1997). 2APB, 2-aminoethoxydiphenyl borate, a membrane-penetrable modulator of Ins(1,4,5)P<sub>3</sub>-induced Ca<sup>2+</sup> release. *J. Biochem.* **122**, 498-505.
- Matsuda, L. A., Lolait, S. J., Brownstein, M. J., Young, A. C. and Bonner, T. I. (1990). Structure of a cannabinoid receptor and functional expression of the cloned cDNA. *Nature* **346**, 561-564.
- Mo, F. M., Offertaler, L. and Kunos, G. (2004). Atypical cannabinoid stimulates endothelial cell migration via a G<sub>i</sub>/G<sub>o</sub>-coupled receptor distinct from CB<sub>1</sub>, CB<sub>2</sub> or EDG-1. *Eur. J. Pharmacol.* **489**, 21-27.
- Mohri, H., Katoh, K., Iwamatsu, A. and Okubo, T. (1996). The novel recognition site in the C-terminal heparin-binding domain of fibronectin by integrin alpha 4 beta 1 receptor on HL-60 cells. *Exp. Cell Res.* **222**, 326-332.
- Mould, A. P., Garratt, A. N., Puzon-McLaughlin, W., Takada, Y. and Humphries, M. J. (1998). Regulation of integrin function: evidence that bivalent-cation-induced conformational changes lead to the unmasking of ligand-binding sites within integrin alpha5 beta1. *Biochem. J.* **331**, 821-828.
- Mukhopadhyay, S., Chapnick, B. M. and Howlett, A. C. (2002). Anandamide-induced vasorelaxation in rabbit aortic rings has two components: G protein dependent and independent. *Am. J. Physiol.* **282**, H2046-H2054.
- Munaron, L. (2002). Calcium signalling and control of cell proliferation by tyrosine kinase receptors (review). *Int. J. Mol. Med.* **10**, 671-676.
- Munro, S., Thomas, K. L. and Abu-Shaar, M. (1993). Molecular characterization of a peripheral receptor for cannabinoids. *Nature* **365**, 61-65.
- Offertaler, L., Mo, F. M., Batkai, S., Liu, J., Begg, M., Razdan, R. K., Martin, B. R., Bukoski, R. D. and Kunos, G. (2003). Selective ligands and cellular effectors of a G protein-coupled endothelial cannabinoid receptor. *Mol. Pharmacol.* **63**, 699-705.
- Oka, S., Nakajima, K., Yamashita, A., Kishimoto, S. and Sugiura, T. (2007). Identification of GPR55 as a lysophosphatidylinositol receptor. *Biochem. Biophys. Res. Commun.* **362**, 928-934.
- Pertwee, R. G. (2005). Inverse agonism and neutral antagonism at cannabinoid CB1 receptors. *Life Sci.* **76**, 1307-1324.
- Portella, G., Laezza, C., Laccetti, P., De Petrocellis, L., Di Marzo, V. and Bifulco, M. (2003). Inhibitory effects of cannabinoid CB1 receptor stimulation on tumor growth and metastatic spreading: actions on signals involved in angiogenesis and metastasis. *FASEB J.* **17**, 1771-1773.
- Qin, L., Zhao, D., Liu, X., Nagy, J. A., Hoang, M. V., Brown, L. F., Dvorak, H. F. and Zeng, H. (2006). Down syndrome candidate region 1 isoform 1 mediates angiogenesis through the calcineurin-NFAT pathway. *Mol. Cancer Res.* **4**, 811-820.
- Qin, S. and Chock, P. B. (2001). Bruton's tyrosine kinase is essential for hydrogen peroxide-induced calcium signaling. *Biochemistry* **40**, 8085-8091.
- Qiu, Y. and Kung, H. J. (2000). Signaling network of the Btk family kinases. *Oncogene* **19**, 5651-5661.
- Qiu, Y., Robinson, D., Pretlow, T. G. and Kung, H. J. (1998). Etk/Bmx, a tyrosine kinase with a pleckstrin-homology domain, is an effector of phosphatidylinositol 3'-kinase and is involved in interleukin 6-induced neuroendocrine differentiation of prostate cancer cells. *Proc. Natl. Acad. Sci. USA* **95**, 3644-3649.
- Randall, M. D. and Kendall, D. A. (1997). Involvement of a cannabinoid in endothelium-derived hyperpolarizing factor-mediated coronary vasorelaxation. *Eur. J. Pharmacol.* **335**, 205-209.
- Randall, M. D. and Kendall, D. A. (1998). Endocannabinoids: a new class of vasoactive substances. *Trends Pharmacol. Sci.* **19**, 55-58.
- Randall, M. D., Harris, D., Kendall, D. A. and Ralevic, V. (2002). Cardiovascular effects of cannabinoids. *Pharmacol. Ther.* **95**, 191-202.
- Rinaldi-Carmona, M., Barth, F., Heaulme, M., Shire, D., Calandra, B., Congy, C., Martinez, S., Maruani, J., Neliat, G., Caput, D. et al. (1994). SR141716A, a potent and selective antagonist of the brain cannabinoid receptor. *FEBS Lett.* **350**, 240-244.
- Rinaldi-Carmona, M., Barth, F., Millan, J., Derocq, J. M., Casellas, P., Congy, C., Oustric, D., Sarran, M., Bouaboula, M., Calandra, B. et al. (1998). SR 144528, the first potent and selective antagonist of the CB<sub>2</sub> cannabinoid receptor. *J. Pharmacol. Exp. Ther.* **284**, 644-650.
- Rodriguez-Fernandez, J. L., Sanchez-Martin, L., Rey, M., Vicente-Manzanares, M., Narumiya, S., Teixido, J., Sanchez-Madrid, F. and Cabanas, C. (2001). Rho and Rho-associated kinase modulate the tyrosine kinase PYK2 in T-cells through regulation of the activity of the integrin LFA-1. *J. Biol. Chem.* **276**, 40518-40527.
- Ronco, A. M., Llanos, M., Tamayo, D. and Hirsch, S. (2006). Anandamide inhibits endothelin-1 production by human cultured endothelial cells: a new vascular action of this endocannabinoid. *Pharmacology* **79**, 12-16.
- Ruoslahti, E. (2003). The RGD story: a personal account. *Matrix Biol.* **22**, 459-465.
- Ruoslahti, E. and Pierschbacher, M. D. (1987). New perspectives in cell adhesion: RGD and integrins. *Science* **238**, 491-497.
- Rupp, P. A. and Little, C. D. (2001). Integrins in vascular development. *Circ. Res.* **89**, 566-572.
- Ryberg, E., Larsson, N., Sjogren, S., Hjorth, S., Hermansson, N. O., Leonova, J., Elebring, T., Nilsson, K., Drmota, T. and Greasley, P. J. (2007). The orphan receptor GPR55 is a novel cannabinoid receptor. *Br. J. Pharmacol.* **152**, 1092-1101.
- Schaeffer, G., Levak-Frank, S., Spitaler, M. M., Fleischhacker, E., Esenbalalu, V. E., Wagner, A. H., Hecker, M. and Graier, W. F. (2003). Intercellular signalling within vascular cells under high D-glucose involves free radical-triggered tyrosine kinase activation. *Diabetologia* **46**, 773-783.
- Shattil, S. J. and Newman, P. J. (2004). Integrins: dynamic scaffolds for adhesion and signaling in platelets. *Blood* **104**, 1606-1615.
- Shire, D., Carillon, C., Kaghad, M., Calandra, B., Rinaldi-Carmona, M., Le Fur, G., Caput, D. and Ferrara, P. (1995). An amino-terminal variant of the central cannabinoid receptor resulting from alternative splicing. *J. Biol. Chem.* **270**, 3726-3731.
- Short, S. M., Talbot, G. A. and Juliano, R. L. (1998). Integrin-mediated signaling events in human endothelial cells. *Mol. Biol. Cell* **9**, 1969-1980.
- Showalter, V. M., Compton, D. R., Martin, B. R. and Abood, M. E. (1996). Evaluation of binding in a transfected cell line expressing a peripheral cannabinoid receptor (CB<sub>2</sub>): identification of cannabinoid receptor subtype selective ligands. *J. Pharmacol. Exp. Ther.* **278**, 989-999.
- Smith, J. W. and Cheresch, D. A. (1990). Integrin (alpha v beta 3)-ligand interaction. Identification of a heterodimeric RGD binding site on the vitronectin receptor. *J. Biol. Chem.* **265**, 2168-2172.
- Staunton, D. E., Lupher, M. L., Liddington, R. and Gallatin, W. M. (2006). Targeting integrin structure and function in disease. *Adv. Immunol.* **91**, 111-157.
- Stephens, L. R., Anderson, K. E. and Hawkins, P. T. (2001). Src family kinases mediate receptor-stimulated, phosphoinositide 3-kinase-dependent, tyrosine phosphorylation of dual adaptor for phosphotyrosine and 3-phosphoinositides-1 in endothelial and B cell lines. *J. Biol. Chem.* **276**, 42767-42773.
- Sugiura, T., Kodaka, T., Nakane, S., Kishimoto, S., Kondo, S. and Waku, K. (1998). Detection of an endogenous cannabinimimetic molecule, 2-arachidonoylglycerol, and cannabinoid CB1 receptor mRNA in human vascular cells: is 2-arachidonoylglycerol a possible vasomodulator? *Biochem. Biophys. Res. Commun.* **243**, 838-843.
- Takada, Y., Mukhopadhyay, A., Kundu, G. C., Mahabeshwar, G. H., Singh, S. and Aggarwal, B. B. (2003). Hydrogen peroxide activates NF-kappa B through tyrosine phosphorylation of I kappa B alpha and serine phosphorylation of p65: evidence for the involvement of I kappa B alpha kinase and Syk protein-tyrosine kinase. *J. Biol. Chem.* **278**, 24233-24241.
- Takesono, A., Finkelstein, L. D. and Schwartzberg, P. L. (2002). Beyond calcium: new signaling pathways for Tec family kinases. *J. Cell Sci.* **115**, 3039-3048.
- Thamilselvan, V., Fomby, M., Walsh, M. and Basson, M. D. (2003). Divalent cations modulate human colon cancer cell adhesion. *J. Surg. Res.* **110**, 255-265.
- Tiruppathi, C., Ahmed, G. U., Vogel, S. M. and Malik, A. B. (2006). Ca<sup>2+</sup> signaling, TRP channels, and endothelial permeability. *Microcirculation* **13**, 693-708.
- Trenker, M., Malli, R., Fertschaj, L., Levak-Frank, S. and Graier, W. F. (2007). Uncoupling-proteins 2 and 3 are elementary for mitochondrial Ca<sup>2+</sup> uniport. *Nat. Cell Biol.* **9**, 445-452.
- Uehata, M., Ishizaki, T., Satoh, H., Ono, T., Kawahara, T., Morishita, T., Tamakawa, H., Yamagami, K., Inui, J., Maekawa, M. et al. (1997). Calcium sensitization of smooth muscle mediated by a Rho-associated protein kinase in hypertension. *Nature* **389**, 990-994.
- Vignali, D. A., Bickle, Q. D., Crocker, P. and Taylor, M. G. (1990). Antibody-dependent killing of Schistosoma mansoni schistosomula in vitro by starch-elicited murine macrophages. Critical role of the cell surface integrin Mac-1 in killing mediated by the anti-Mr 16,000 mAb B3A. *J. Immunol.* **144**, 4030-4037.
- von Albertini, M., Palmethofer, A., Kaczmarek, E., Koziak, K., Stroka, D., Grey, S. T., Stuhlmeier, K. M. and Robson, S. C. (1998). Extracellular ATP and ADP activate transcription factor NF-kappa B and induce endothelial cell apoptosis. *Biochem. Biophys. Res. Commun.* **248**, 822-829.
- Wagner, J. A., Varga, K., Jarai, Z. and Kunos, G. (1999). Mesenteric vasodilation mediated by endothelial anandamide receptors. *Hypertension* **33**, 429-434.
- Wang, L., Duke, L., Zhang, P. S., Arlinghaus, R. B., Symmans, W. F., Sahin, A., Mendez, R. and Dai, J. L. (2003). Alternative splicing disrupts a nuclear localization signal in spleen tyrosine kinase that is required for invasion suppression in breast cancer. *Cancer Res.* **63**, 4724-4730.
- White, R. and Hiley, C. R. (1997). A comparison of EDHF-mediated and anandamide-induced relaxations in the rat isolated mesenteric artery. *Br. J. Pharmacol.* **122**, 1573-1584.
- Woodside, D. G., Obergfell, A., Talapatra, A., Calderwood, D. A., Shattil, S. J. and Ginsberg, M. H. (2002). The N-terminal SH2 domains of Syk and ZAP-70 mediate phosphotyrosine-independent binding to integrin beta cytoplasmic domains. *J. Biol. Chem.* **277**, 39401-39408.
- Zoratti, C., Kipmen-Korgun, D., Osibow, K., Malli, R. and Graier, W. F. (2003). Anandamide initiates Ca<sup>2+</sup> signaling via CB<sub>2</sub> receptor linked to phospholipase C in calf pulmonary endothelial cells. *Br. J. Pharmacol.* **140**, 1351-1362.
